# Supplementary material for: Automating crystal-structure phase mapping by combining deep learning with constraint reasoning
Source: Springer Nature journal article supplement (doi:10.1038/s42256-021-00384-1), 2021-09-16
Supplement: MOESM5 [file 42256_2021_384_MOESM5_ESM.xlsx]

## Sheet: Sheet1
Number of Data Points	Phase Activation Accuracy
1	0.6407
50	0.68
100	0.74
150	0.9933
200	1
231	1
