# Supplementary material for: Automating crystal-structure phase mapping by combining deep learning with constraint reasoning
Source: Springer Nature journal article supplement (doi:10.1038/s42256-021-00384-1), 2021-09-16
Supplement: MOESM6 [file 42256_2021_384_MOESM6_ESM.xlsx]

## Sheet: Sheet1
DRNets-downscaling
Number of overlapping 4x4 Sudokus		batch size	Sudoku acc	Digit acc
1		1	0.91	0.978
5		1	0.94	0.984
10		1	0.96	0.989
20		2	0.966	0.991
50		5	0.968	0.992
100		10	0.987	0.997
200		20	0.993	0.998
500		50	0.988	0.997
1000		100	0.997	0.999
DRNets-downscaling
Number of overlapping 9x9 Sudokus		batch size	Sudoku acc	Digit acc
1 (100 trials)		1	0.01	0.0864
5 (100 trials)		1	0.324	0.602
10 (100 trials)		1	0.475	0.7665
20 (50 trials)		2	0.626	0.8693
50 (20 trials)		5	0.82	0.9893
100 (10 trials)		10	0.988	0.9933
200 (5 trials)		20	0.987	0.9997
500 (2 trials)		20	0.999	0.9999
1000 (1 trials)		40	0.999	0.9999
10000 (1trials)		40	0.998	0.9999
