# Supplementary material for: Automating crystal-structure phase mapping by combining deep learning with constraint reasoning
Source: Springer Nature journal article supplement (doi:10.1038/s42256-021-00384-1), 2021-09-16
Supplement: MOESM7 [file 42256_2021_384_MOESM7_ESM.xlsx]

## Sheet: E5
Comparison of the phase patterns discovered by different methods vs. the ground truth phases for the Al-Li-Fe oxide system
Phase 1																								Phase 2																								Phase 3
Al2O3 Rhombohedral (04-015-8996)																								Li2O Cubic (04-016-3060)																								Fe2O3 Rhombohedral (04-006-6579)
Ground Truth						DRNets						IAFD						NMF-k						Ground Truth						DRNets						IAFD						NMF-k						Ground Truth
Model			Stick patterns			Model			Stick patterns			Model			Stick patterns			Model			Stick patterns			Model			Stick patterns			Model			Stick patterns			Model			Stick patterns			Model			Stick patterns			Model
q, scattering vector magnitude (nm^-1)	XRD Intensity (arb. units)		q, scattering vector magnitude (nm^-1)	XRD Intensity (arb. units)		q, scattering vector magnitude (nm^-1)	XRD Intensity (arb. units)		q, scattering vector magnitude (nm^-1)	XRD Intensity (arb. units)		q, scattering vector magnitude (nm^-1)	XRD Intensity (arb. units)		q, scattering vector magnitude (nm^-1)	XRD Intensity (arb. units)		q, scattering vector magnitude (nm^-1)	XRD Intensity (arb. units)		q, scattering vector magnitude (nm^-1)	XRD Intensity (arb. units)		q, scattering vector magnitude (nm^-1)	XRD Intensity (arb. units)		q, scattering vector magnitude (nm^-1)	XRD Intensity (arb. units)		q, scattering vector magnitude (nm^-1)	XRD Intensity (arb. units)		q, scattering vector magnitude (nm^-1)	XRD Intensity (arb. units)		q, scattering vector magnitude (nm^-1)	XRD Intensity (arb. units)		q, scattering vector magnitude (nm^-1)	XRD Intensity (arb. units)		q, scattering vector magnitude (nm^-1)	XRD Intensity (arb. units)		q, scattering vector magnitude (nm^-1)	XRD Intensity (arb. units)		q, scattering vector magnitude (nm^-1)	XRD Intensity (arb. units)
15.0083	0		18.05	0.66313		15.0083	0		18.05	0.66313		15.0083	0		18.05	0.66313		15.1111	0.000114032		18.05	0.611331		15.0008	0		23.6	1		15.0008	0		23.6	1		14.938	0.000268747		23.6	0.94862		15.0008	6.32482e-05		23.6	1		14.9172	0.00289425
15.1083	0		24.638	1		15.1083	0		24.638	1		15.1083	0		24.638	1		15.2118	7.8739e-05		24.638	0.921887		15.1008	0		27.258	0.058		15.1008	0		27.258	0.058		15.0376	2.95782e-05		27.258	0.0550199		15.1008	3.40098e-05		27.258	0.058		15.0166	0.0043904
15.2084	0		26.407	0.462202		15.2084	0		26.407	0.462202		15.2084	2.5259e-09		26.407	0.462202		15.3126	8.78191e-05		26.407	0.426098		15.2008	0		38.539	0.533		15.2008	0		38.539	0.533		15.1372	0		38.539	0.505614		15.2008	1.26983e-05		38.539	0.533		15.1161	0.00652919
15.3084	0		29.006	0.00530504		15.3084	0		29.006	0.00530504		15.3084	6.2704e-09		29.006	0.00530504		15.4133	9.09856e-05		29.006	0.00489065		15.3008	0		45.194	0.15		15.3008	0		45.194	0.15		15.2367	0.000224026		45.194	0.142293		15.3008	1.4302e-05		45.194	0.15		15.2155	0.00951943
15.4085	0		30.125	0.954907		15.4085	0		30.125	0.954907		15.4085	1.18704e-08		30.125	0.954907		15.5141	0.000162686		30.125	0.880316		15.4008	0		47.2	0.001		15.4008	0		47.2	0.001		15.3363	1.27333e-06		47.2	0.00094862		15.4008	9.74034e-06		47.2	0.001		15.315	0.0136069
15.5085	0		31.985	0.015252		15.5085	0		31.985	0.015252		15.5085	1.56907e-08		31.985	0.015252		15.6148	0.000252792		31.985	0.0140606		15.5008	0		54.492	0.047		15.5008	0		54.492	0.047		15.4359	0.000203385		54.492	0.0445851		15.5008	6.95472e-06		54.492	0.047		15.4144	0.0190683
15.6086	0		36.118	0.46817		15.6086	0		36.118	0.46817		15.6086	1.73908e-08		36.118	0.46817		15.7155	0.000414851		36.118	0.4316		15.6008	0		59.378	0.035		15.6008	0		59.378	0.035		15.5355	7.30738e-06		59.378	0.0332017		15.6008	2.13963e-17		59.378	0.035		15.5139	0.0261974
15.7086	0		39.223	0.908488		15.7086	0		39.223	0.908488		15.7086	2.32958e-08		39.223	0.908488		15.8163	0.000785454		39.223	0.837523		15.7008	0		60.935	0.001		15.7008	0		60.935	0.001		15.6351	6.99241e-05		60.935	0.00094862		15.7008	2.13963e-17		60.935	0.001		15.6133	0.035286
15.8087	0		40.613	0.0232095		15.8087	0		40.613	0.0232095		15.8087	0		40.613	0.0232095		15.917	0.00121932		40.613	0.0213966		15.8008	0		66.764	0.074		15.8008	0		66.764	0.074		15.7347	3.23672e-06		66.764	0.0701979		15.8008	1.58275e-06		66.764	0.074		15.7128	0.0465956
15.9088	0		41.479	0.0331565		15.9088	0		41.479	0.0331565		15.9088	0		41.479	0.0331565		16.0178	0.00209175		41.479	0.0305665		15.9008	0		70.824	0.024		15.9008	0		70.824	0.024		15.8343	0		70.824	0.0227669		15.9008	2.13963e-17		70.824	0.024		15.8122	0.0603231
16.0088	0		41.587	0.0848806		16.0088	0		41.587	0.0848806		16.0088	2.34529e-05		41.587	0.0848806		16.1185	0.00319699		41.587	0.0782503		16.0008	0		77.078	0.025		16.0008	0		77.078	0.025		15.9339	5.37751e-05		77.078	0.0237155		16.0008	4.83591e-06		77.078	0.025		15.9117	0.0765634
16.1089	0		44.728	0.348806		16.1089	0		44.728	0.348806		16.1089	0.00184785		44.728	0.348806		16.2193	0.00506044		44.728	0.32156		16.1008	0					16.1008	0					16.0334	8.47321e-06					16.1008	3.11945e-06					16.0111	0.0952698
16.2089	0		45.721	0.527851		16.2089	0		45.721	0.527851		16.2089	0.002163		45.721	0.527851		16.32	0.00690412		45.721	0.486619		16.2008	0					16.2008	0					16.133	8.6081e-06					16.2008	2.13963e-17					16.1106	0.116222
16.309	0		47.038	0.0112732		16.309	0		47.038	0.0112732		16.309	0.00278344		47.038	0.0112732		16.4207	0.0086971		47.038	0.0103926		16.3008	0					16.3008	0					16.2326	2.19815e-05					16.3008	2.53691e-06					16.21	0.139
16.409	0		49.24	0.0139257		16.409	0		49.24	0.0139257		16.409	0.00325569		49.24	0.0139257		16.5215	0.00917922		49.24	0.0128379		16.4008	0					16.4008	0					16.3322	5.06127e-05					16.4008	1.61072e-05					16.3095	0.162983
16.5091	3.30057e-09		50.721	0.147215		16.5091	0		50.721	0.147215		16.5091	0.00307368		50.721	0.147215		16.6222	0.00731757		50.721	0.135715		16.5008	0					16.5008	0					16.4318	9.22472e-05					16.5008	1.30585e-05					16.4089	0.187356
16.6091	3.30057e-08		50.919	0.0842175		16.6091	0		50.919	0.0842175		16.6091	0.00192412		50.919	0.0842175		16.723	0.00504108		50.919	0.077639		16.6008	0					16.6008	0					16.5314	0.000145965					16.6008	2.12916e-05					16.5083	0.21115
16.7092	3.06953e-07		52.67	0.00729443		16.7092	0		52.67	0.00729443		16.7092	7.55299e-05		52.67	0.00729443		16.8237	0.00114018		52.67	0.00672464		16.7008	0					16.7008	0					16.631	0.000202986					16.7008	2.80412e-05					16.6078	0.233298
16.8092	2.45892e-06		52.796	0.0576923		16.8092	2.9518e-06		52.796	0.0576923		16.8092	5.97931e-06		52.796	0.0576923		16.9244	8.828e-05		52.796	0.0531858		16.8008	0					16.8008	0					16.7305	0.00024379					16.8008	2.29867e-05					16.7072	0.252712
16.9093	1.67801e-05		54.168	0.00596817		16.9093	1.67269e-05		54.168	0.00596817		16.9093	1.8848e-05		54.168	0.00596817		17.0252	0.000132312		54.168	0.00550198		16.9008	0					16.9008	0					16.8301	0.000224174					16.9008	7.2965e-05					16.8067	0.268375
17.0094	9.75319e-05		54.782	0.0450928		17.0094	9.74095e-05		54.782	0.0450928		17.0094	8.41863e-05		54.782	0.0450928		17.1259	0.000559833		54.782	0.0415705		17.0009	0					17.0009	0					16.9297	0.000200391					17.0009	0.00013531					16.9061	0.279417
17.1094	0.000483081		55.161	0.00331565		17.1094	0.000484096		55.161	0.00331565		17.1094	0.000383284		55.161	0.00331565		17.2267	0.00200542		55.161	0.00305665		17.1009	0					17.1009	0					17.0293	0.00023605					17.1009	0.000199149					17.0056	0.285209
17.2095	0.00203895		55.793	0.0338196		17.2095	0.00204068		55.793	0.0338196		17.2095	0.00164057		55.793	0.0338196		17.3274	0.0105818		55.793	0.0311779		17.2009	0					17.2009	0					17.1289	0.00021442					17.2009	0.000629861					17.105	0.285411
17.3095	0.0073332		55.901	0.0291777		17.3095	0.00733818		55.901	0.0291777		17.3095	0.00658151		55.901	0.0291777		17.4281	0.0434804		55.901	0.0268986		17.3009	0					17.3009	0					17.2285	0.000165668					17.3009	0.00155896					17.2045	0.280011
17.4096	0.0224753		57.164	0.0629973		17.4096	0.0224859		57.164	0.0629973		17.4096	0.0236022		57.164	0.0629973		17.5289	0.120658		57.164	0.0580764		17.4009	0					17.4009	0					17.3281	0.000130675					17.4009	0.00274618					17.3039	0.269325
17.5096	0.0586988		58.013	0.0159151		17.5096	0.0587173		58.013	0.0159151		17.5096	0.0687579		58.013	0.0159151		17.6296	0.243797		58.013	0.0146719		17.5009	0					17.5009	0					17.4277	7.54748e-05					17.5009	0.00486389					17.4034	0.253967
17.6097	0.130637		58.283	0.0762599		17.6097	0.13066		58.283	0.0762599		17.6097	0.155198		58.283	0.0762599		17.7304	0.384941		58.283	0.070303		17.6009	0					17.6009	0					17.5272	5.4318e-05					17.6009	0.00803864					17.5028	0.234787
17.7097	0.24775		60.07	0.00397878		17.7097	0.247768		60.07	0.00397878		17.7097	0.278112		60.07	0.00397878		17.8311	0.521016		60.07	0.00366798		17.7009	0					17.7009	0					17.6268	4.0445e-05					17.7009	0.0107669					17.6023	0.212798
17.8098	0.400379		60.233	0.143899		17.8098	0.400377		60.233	0.143899		17.8098	0.41489		60.233	0.143899		17.9318	0.617592		60.233	0.132659		17.8009	0					17.8009	0					17.7264	3.27825e-05					17.8009	0.0114978					17.7017	0.189087
17.9099	0.551374		61.713	0.0179045		17.9099	0.551342		61.713	0.0179045		17.9099	0.53288		61.713	0.0179045		18.0326	0.655921		61.713	0.0165059		17.9009	0					17.9009	0					17.826	3.27148e-05					17.9009	0.0114515					17.8012	0.164722
18.0099	0.647043		62.958	0.104775		18.0099	0.646989		62.958	0.104775		18.0099	0.600832		62.958	0.104775		18.1333	0.627967		62.958	0.0965903		18.0009	0					18.0009	0					17.9256	1.92085e-05					18.0009	0.00844374					17.9006	0.140682
18.11	0.647042		63.716	0.00331565		18.11	0.64699		63.716	0.00331565		18.11	0.600375		63.716	0.00331565		18.2341	0.548208		63.716	0.00305665		18.1009	0					18.1009	0					18.0252	3.01447e-06					18.1009	0.00411635					18.0001	0.117794
18.21	0.551372		63.987	0.0192308		18.21	0.551344		63.987	0.0192308		18.21	0.533663		63.987	0.0192308		18.3348	0.430258		63.987	0.0177286		18.2009	0					18.2009	0					18.1248	1.00288e-08					18.2009	0.000221607					18.0995	0.096695
18.3101	0.400379		64.583	0.00132626		18.3101	0.400383		64.583	0.00132626		18.3101	0.422543		64.583	0.00132626		18.4355	0.302346		64.583	0.00122266		18.3009	0					18.3009	0					18.2243	1.97574e-09					18.3009	2.13963e-17					18.199	0.077819
18.4101	0.247748		66.623	0.00397878		18.4101	0.24777		66.623	0.00397878		18.4101	0.297258		66.623	0.00397878		18.5363	0.18849		66.623	0.00366798		18.4009	0					18.4009	0					18.3239	1.25047e-10					18.4009	2.13963e-17					18.2984	0.0613991
18.5102	0.130635		66.767	0.00331565		18.5102	0.130662		66.767	0.00331565		18.5102	0.183798		66.767	0.00331565		18.637	0.100129		66.767	0.00305665		18.5009	0					18.5009	0					18.4235	1.25047e-11					18.5009	2.13963e-17					18.3979	0.0474938
18.6102	0.0586978		67.2	0.0298408		18.6102	0.0587183		67.2	0.0298408		18.6102	0.096364		67.2	0.0298408		18.7378	0.0421041		67.2	0.0275099		18.6009	0					18.6009	0					18.5231	0					18.6009	2.13963e-17					18.4973	0.0360171
18.7103	0.0224748		68.446	0.0198939		18.7103	0.0224859		68.446	0.0198939		18.7103	0.0415611		68.446	0.0198939		18.8385	0.0122439		68.446	0.0183399		18.7009	0					18.7009	0					18.6227	0					18.7009	2.13963e-17					18.5968	0.026778
18.8103	0.0073332		69.204	0.0961538		18.8103	0.00733818		69.204	0.0961538		18.8103	0.0140549		69.204	0.0961538		18.9392	0.00201998		69.204	0.088643		18.8009	0					18.8009	0					18.7223	0					18.8009	2.13963e-17					18.6962	0.0195185
18.9104	0.00203889		69.42	0.0722812		18.9104	0.00204068		69.42	0.0722812		18.9104	0.00362632		69.42	0.0722812		19.04	0.000137792		69.42	0.0666351		18.9009	0					18.9009	0					18.8219	0					18.9009	2.13963e-17					18.7956	0.013948
19.0105	0.000483068		69.89	0.0550398		19.0105	0.000484096		69.89	0.0550398		19.0105	0.0006231		69.89	0.0550398		19.1407	6.56765e-06		69.89	0.0507405		19.001	0					19.001	0					18.9214	0					19.001	2.13963e-17					18.8951	0.00977183
19.1105	9.75286e-05		70.684	0.00331565		19.1105	9.74095e-05		70.684	0.00331565		19.1105	7.41237e-05		70.684	0.00331565		19.2415	3.47935e-17		70.684	0.00305665		19.101	0					19.101	0					19.021	0					19.101	2.13963e-17					18.9945	0.00671165
19.2106	1.67801e-05		71.316	0.0311671		19.2106	1.67269e-05		71.316	0.0311671		19.2106	7.53881e-06		71.316	0.0311671		19.3422	3.47935e-17		71.316	0.0287325		19.201	0					19.201	0					19.1206	0					19.201	0.000130067					19.094	0.00451945
19.3106	2.45892e-06		72.218	0.0198939		19.3106	2.9518e-06		72.218	0.0198939		19.3106	0		72.218	0.0198939		19.443	3.47935e-17		72.218	0.0183399		19.301	0					19.301	0					19.2202	0					19.301	0.00202629					19.1934	0.00298366
19.4107	3.06953e-07		73.229	0.106764		19.4107	0		73.229	0.106764		19.4107	0		73.229	0.106764		19.5437	3.47935e-17		73.229	0.0984243		19.401	0					19.401	0					19.3198	0.00024155					19.401	0.00665877					19.2929	0.00193116
19.5107	3.30057e-08		73.915	0.0391247		19.5107	0		73.915	0.0391247		19.5107	0		73.915	0.0391247		19.6444	2.86084e-06		73.915	0.0360685		19.501	0					19.501	0					19.4194	3.11468e-05					19.501	0.00878067					19.3923	0.00122559
19.6108	3.30057e-09		74.276	0.0431034		19.6108	0		74.276	0.0431034		19.6108	0		74.276	0.0431034		19.7452	3.47935e-17		74.276	0.0397365		19.601	0					19.601	0					19.519	1.5892e-06					19.601	0.00942114					19.4918	0.000762778
19.7108	0		74.528	0.00397878		19.7108	0		74.528	0.00397878		19.7108	0		74.528	0.00397878		19.8459	3.47935e-17		74.528	0.00366798		19.701	0					19.701	0					19.6186	3.76054e-05					19.701	0.00763111					19.5912	0.000466182
19.8109	0		74.709	0.00198939		19.8109	0		74.709	0.00198939		19.8109	0		74.709	0.00198939		19.9467	3.47935e-17		74.709	0.00183399		19.801	0					19.801	0					19.7181	0.000181335					19.801	0.00553047					19.6907	0.0002805
19.911	0		75.611	0.157825		19.911	0		75.611	0.157825		19.911	0		75.611	0.157825		20.0474	3.47935e-17		75.611	0.145497		19.901	0					19.901	0					19.8177	0					19.901	0.00379595					19.7901	0.000168124
20.011	0		76.532	0.00132626		20.011	0		76.532	0.00132626		20.011	0		76.532	0.00132626		20.1481	3.1786e-06		76.532	0.00122266		20.001	0					20.001	0					19.9173	0.000164984					20.001	0.00179763					19.8896	0.000104035
20.1111	0		76.911	0.00530504		20.1111	0		76.911	0.00530504		20.1111	0		76.911	0.00530504		20.2489	3.77959e-05		76.911	0.00489065		20.101	1.24794e-07					20.101	0					20.0169	5.10229e-05					20.101	0.000977657					19.989	7.28684e-05
20.2111	0		77.182	0.0198939		20.2111	0		77.182	0.0198939		20.2111	0		77.182	0.0198939		20.3496	6.49713e-05		77.182	0.0183399		20.201	3.74381e-07					20.201	0					20.1165	1.18889e-05					20.201	0.000399674					20.0885	6.73082e-05
20.3112	0		77.868	0.0623342		20.3112	0		77.868	0.0623342		20.3112	0		77.868	0.0623342		20.4504	9.0391e-05		77.868	0.0574651		20.301	8.73556e-07					20.301	0					20.2161	6.76452e-05					20.301	0.000215406					20.1879	8.69154e-05
20.4112	0		78.445	0.00198939		20.4112	0		78.445	0.00198939		20.4112	0		78.445	0.00198939		20.5511	0.000159925		78.445	0.00183399		20.401	1.9967e-06					20.401	0					20.3157	0					20.401	0.000194479					20.2874	0.000138567
20.5113	0		78.644	0.0431034		20.5113	0		78.644	0.0431034		20.5113	0		78.644	0.0431034		20.6518	8.93724e-05		78.644	0.0397365		20.501	4.49258e-06					20.501	0					20.4152	0					20.501	9.60618e-05					20.3868	0.000237774
20.6113	0					20.6113	0					20.6113	0					20.7526	1.48919e-05					20.601	9.85871e-06					20.601	0					20.5148	6.93444e-06					20.601	9.82096e-05					20.4863	0.000412629
20.7114	0					20.7114	0					20.7114	0					20.8533	3.47935e-17					20.701	2.10901e-05					20.701	2.09806e-05					20.6144	4.9053e-05					20.701	3.31011e-05					20.5857	0.000708199
20.8114	0					20.8114	0					20.8114	0					20.9541	5.09916e-06					20.801	4.38026e-05					20.801	4.19612e-05					20.714	3.54882e-06					20.801	9.79023e-06					20.6852	0.00119516
20.9115	0					20.9115	0					20.9115	3.38593e-13					21.0548	3.47935e-17					20.901	8.84788e-05					20.901	8.39224e-05					20.8136	1.98862e-07					20.901	4.8879e-06					20.7846	0.00197901
21.0116	0					21.0116	0					21.0116	3.72452e-12					21.1555	3.47935e-17					21.0011	0.000174337					21.0011	0.000167845					20.9132	2.37964e-08					21.0011	1.78067e-06					20.8841	0.00321338
21.1116	0					21.1116	0					21.1116	3.96153e-11					21.2563	3.47935e-17					21.1011	0.000334946					21.1011	0.00033569					21.0128	1.73815e-09					21.1011	7.11906e-06					20.9835	0.00511557
21.2117	0					21.2117	0					21.2117	3.369e-10					21.357	3.00893e-06					21.2011	0.000627089					21.2011	0.000629418					21.1124	1.12542e-10					21.2011	2.13963e-17					21.083	0.00798422
21.3117	0					21.3117	0					21.3117	4.40272e-09					21.4578	1.45476e-06					21.3011	0.00114436					21.3011	0.00115393					21.2119	0					21.3011	2.13963e-17					21.1824	0.012217
21.4118	0					21.4118	0					21.4118	1.47118e-08					21.5585	4.45972e-06					21.4011	0.00203576					21.4011	0.0020561					21.3115	0					21.4011	2.13963e-17					21.2818	0.0183277
21.5118	0					21.5118	0					21.5118	2.08793e-08					21.6592	1.41037e-07					21.5011	0.00353004					21.5011	0.00354572					21.4111	0					21.5011	2.13963e-17					21.3813	0.0269556
21.6119	0					21.6119	0					21.6119	0					21.76	3.47935e-17					21.6011	0.00596614					21.6011	0.00600045					21.5107	3.75141e-11					21.6011	2.13963e-17					21.4807	0.0388679
21.7119	0					21.7119	0					21.7119	0					21.8607	3.47935e-17					21.7011	0.00982863					21.7011	0.00988187					21.6103	1.03789e-09					21.7011	2.13963e-17					21.5802	0.054946
21.812	0					21.812	0					21.812	0					21.9615	3.47935e-17					21.8011	0.0157824					21.8011	0.0158613					21.7099	1.02664e-08					21.8011	2.13963e-17					21.6796	0.0761524
21.9121	0					21.9121	0					21.9121	4.89605e-10					22.0622	4.95581e-06					21.9011	0.0247024					21.9011	0.0248201					21.8095	8.35064e-08					21.9011	2.13963e-17					21.7791	0.103476
22.0121	0					22.0121	0					22.0121	9.37461e-09					22.163	1.85848e-05					22.0011	0.0376865					22.0011	0.03787					21.909	8.35664e-07					22.0011	2.13963e-17					21.8785	0.137851
22.1122	0					22.1122	0					22.1122	9.40573e-08					22.2637	0.000140991					22.1011	0.0560421					22.1011	0.05627					22.0086	2.90006e-05					22.1011	3.06934e-06					21.978	0.180051
22.2122	0					22.2122	0					22.2122	3.64116e-07					22.3644	0.000726733					22.2011	0.0812316					22.2011	0.0815516					22.1082	0.00140932					22.2011	2.13963e-17					22.0774	0.230572
22.3123	0					22.3123	0					22.3123	0					22.4652	0.00558819					22.3011	0.114767					22.3011	0.115163					22.2078	0.00677494					22.3011	1.51303e-05					22.1769	0.289502
22.4123	0					22.4123	0					22.4123	0.000277168					22.5659	0.0165051					22.4011	0.158048					22.4011	0.15855					22.3074	0.0193807					22.4011	3.70376e-05					22.2763	0.356409
22.5124	0					22.5124	0					22.5124	0.0020054					22.6667	0.023936					22.5011	0.212152					22.5011	0.212764					22.407	0.0453777					22.5011	0.0020905					22.3758	0.430248
22.6124	0					22.6124	0					22.6124	0.00300762					22.7674	0.0247376					22.6011	0.277579					22.6011	0.278287					22.5066	0.0929993					22.6011	0.0127831					22.4752	0.509319
22.7125	0					22.7125	0					22.7125	0.00303031					22.8681	0.0178007					22.7011	0.354003					22.7011	0.354824					22.6062	0.17042					22.7011	0.0344955					22.5747	0.591294
22.8126	0					22.8126	0					22.8126	0					22.9689	0.00882016					22.8011	0.440056					22.8011	0.44097					22.7057	0.27953					22.8011	0.072097					22.6741	0.673309
22.9126	0					22.9126	0					22.9126	0					23.0696	0.00127767					22.9011	0.533203					22.9011	0.534208					22.8053	0.415483					22.9011	0.124909					22.7736	0.752149
23.0127	0					23.0127	0					23.0127	3.52184e-06					23.1704	0.000193457					23.0012	0.629738					23.0012	0.630803					22.9049	0.563495					23.0012	0.201695					22.873	0.824479
23.1127	6.60114e-09					23.1127	0					23.1127	3.26709e-06					23.2711	3.47935e-17					23.1012	0.724951					23.1012	0.726055					23.0045	0.702856					23.1012	0.302414					22.9725	0.887139
23.2128	6.60114e-08					23.2128	0					23.2128	3.92978e-06					23.3718	3.47935e-17					23.2012	0.813466					23.2012	0.814614					23.1041	0.817033					23.2012	0.430259					23.0719	0.937445
23.3128	5.97403e-07					23.3128	9.83935e-07					23.3128	4.60614e-06					23.4726	5.11299e-06					23.3012	0.889717					23.3012	0.890879					23.2037	0.899769					23.3012	0.575547					23.1714	0.973471
23.4129	4.68681e-06					23.4129	4.91967e-06					23.4129	5.76036e-06					23.5733	3.81757e-06					23.4012	0.948522					23.4012	0.949666					23.3033	0.954142					23.4012	0.714813					23.2708	0.994271
23.5129	3.13752e-05					23.5129	3.14859e-05					23.5129	2.56197e-05					23.6741	7.30927e-05					23.5012	0.985653					23.5012	0.986802					23.4028	0.986592					23.5012	0.830096					23.3703	1
23.613	0.000178977					23.613	0.00018006					23.613	0.000132374					23.7748	0.00132786					23.6012	0.99835					23.6012	0.999474					23.5024	1					23.6012	0.89394					23.4697	0.991924
23.713	0.000869968					23.713	0.000873734					23.713	0.000708014					23.8755	0.0111851					23.7012	0.985653					23.7012	0.98676					23.602	0.991036					23.7012	0.899487					23.5691	0.972306
23.8131	0.0036034					23.8131	0.00361891					23.8131	0.00368608					23.9763	0.0564337					23.8012	0.948522					23.8012	0.949603					23.7016	0.952362					23.8012	0.829918					23.6686	0.944168
23.9132	0.0127191					23.9132	0.0127646					23.9132	0.01652					24.077	0.15857					23.9012	0.889717					23.9012	0.890774					23.8012	0.881277					23.9012	0.696028					23.768	0.910973
24.0132	0.0382556					24.0132	0.0383695					24.0132	0.0547842					24.1778	0.317198					24.0012	0.813466					24.0012	0.814488					23.9008	0.782965					24.0012	0.521428					23.8675	0.876253
24.1133	0.0980515					24.1133	0.0982902					24.1133	0.135374					24.2785	0.513102					24.1012	0.724951					24.1012	0.725929					24.0004	0.66815					24.1012	0.349626					23.9669	0.843222
24.2133	0.214154					24.2133	0.214562					24.2133	0.268122					24.3792	0.713012					24.2012	0.629738					24.2012	0.630656					24.1	0.549501					24.2012	0.209319					24.0664	0.814445
24.3134	0.398571					24.3134	0.39913					24.3134	0.446815					24.48	0.877966					24.3012	0.533206					24.3012	0.534061					24.1995	0.439777					24.3012	0.110455					24.1658	0.791587
24.4134	0.632131					24.4134	0.632714					24.4134	0.644284					24.5807	0.986349					24.4012	0.440058					24.4012	0.440824					24.2991	0.348318					24.4012	0.0503759					24.2653	0.775264
24.5135	0.854308					24.5135	0.854722					24.5135	0.815955					24.6815	1					24.5012	0.354006					24.5012	0.354698					24.3987	0.277449					24.5012	0.0185105					24.3647	0.765038
24.6135	0.983869					24.6135	0.983935					24.6135	0.914629					24.7822	0.915881					24.6012	0.277585					24.6012	0.278182					24.4983	0.223867					24.6012	0.00608152					24.4642	0.75953
24.7136	0.965544					24.7136	0.965232					24.7136	0.90836					24.883	0.754905					24.7012	0.212165					24.7012	0.21268					24.5979	0.182094					24.7012	0.00295622					24.5636	0.756637
24.8137	0.807461					24.8137	0.806907					24.8137	0.795702					24.9837	0.554844					24.8012	0.158075					24.8012	0.158488					24.6975	0.146421					24.8012	0.00201329					24.6631	0.75383
24.9137	0.575413					24.9137	0.574829					24.9137	0.609287					25.0844	0.353615					24.9012	0.114814					24.9012	0.115163					24.7971	0.113545					24.9012	0.00187066					24.7625	0.748482
25.0138	0.349427					25.0138	0.348962					25.0138	0.401512					25.1852	0.190176					25.0013	0.0813165					25.0013	0.0815936					24.8966	0.0831909					25.0013	0.00187286					24.862	0.738192
25.1138	0.180819					25.1138	0.180527					25.1138	0.221703					25.2859	0.0814897					25.1013	0.0561914					25.1013	0.0563959					24.9962	0.0567249					25.1013	0.00170104					24.9614	0.721061
25.2139	0.0797374					25.2139	0.0795885					25.2139	0.098976					25.3867	0.0290633					25.2013	0.0379425					25.2013	0.0381008					25.0958	0.0357111					25.2013	0.00187969					25.0609	0.695887
25.3139	0.0299866					25.3139	0.0299244					25.3139	0.0353242					25.4874	0.00947559					25.3013	0.0251307					25.3013	0.0252397					25.1954	0.0205931					25.3013	0.00238458					25.1603	0.662269
25.414	0.00973103					25.414	0.00970947					25.414	0.0109084					25.5881	0.00627404					25.4013	0.0164801					25.4013	0.0165537					25.295	0.0106801					25.4013	0.00367127					25.2598	0.620607
25.514	0.0032541					25.514	0.00324994					25.514	0.0038797					25.6889	0.01739					25.5013	0.0109371					25.5013	0.0109938					25.3946	0.00481796					25.5013	0.00530887					25.3592	0.572024
25.6141	0.00311673					25.6141	0.00312202					25.6141	0.00330251					25.7896	0.0548656					25.6013	0.00768243					25.6013	0.00772086					25.4942	0.00179511					25.6013	0.00594945					25.4587	0.518188
25.7141	0.00854354					25.7141	0.0085622					25.7141	0.00958952					25.8904	0.117371					25.7013	0.00612026					25.7013	0.00614732					25.5938	0.00050285					25.7013	0.00507801					25.5581	0.461126
25.8142	0.0241245					25.8142	0.0241694					25.8142	0.0303905					25.9911	0.198584					25.8013	0.00584659					25.8013	0.00587457					25.6933	0.000111352					25.8013	0.00490817					25.6576	0.403001
25.9143	0.0587854					25.9143	0.0588698					25.9143	0.0744256					26.0918	0.288427					25.9013	0.00660895					25.9013	0.00662987					25.7929	0.000208377					25.9013	0.00450626					25.757	0.3459
26.0143	0.122153					26.0143	0.122287					26.0143	0.146794					26.1926	0.37095					26.0013	0.00826484					26.0013	0.00828734					25.8925	0.000797065					26.0013	0.00418784					25.8564	0.291684
26.1144	0.21631					26.1144	0.216475					26.1144	0.24254					26.2933	0.426884					26.1013	0.0107406					26.1013	0.010784					25.9921	0.00226703					26.1013	0.00312727					25.9559	0.241849
26.2144	0.32641					26.2144	0.32656					26.2144	0.340761					26.3941	0.446105					26.2013	0.0139929					26.2013	0.014036					26.0917	0.00513759					26.2013	0.00233711					26.0553	0.197476
26.3145	0.419722					26.3145	0.419799					26.3145	0.414382					26.4948	0.421469					26.3013	0.017975					26.3013	0.0180223					26.1913	0.00980841					26.3013	0.00180226					26.1548	0.159214
26.4145	0.459911					26.4145	0.45988					26.4145	0.441125					26.5955	0.35779					26.4013	0.0226111					26.4013	0.0226591					26.2909	0.0163668					26.4013	0.00195525					26.2542	0.127314
26.5146	0.429437					26.5146	0.429311					26.5146	0.413828					26.6963	0.277025					26.5013	0.0277744					26.5013	0.0278203					26.3904	0.024364					26.5013	0.00311571					26.3537	0.101693
26.6146	0.341693					26.6146	0.341527					26.6146	0.343395					26.797	0.191863					26.6013	0.033278					26.6013	0.0333382					26.49	0.0327031					26.6013	0.00737404					26.4531	0.0820158
26.7147	0.231679					26.7147	0.231527					26.7147	0.25253					26.8978	0.119869					26.7013	0.0388755					26.7013	0.03894					26.5896	0.0400291					26.7013	0.0139716					26.5526	0.0677804
26.8148	0.133861					26.8148	0.133754					26.8148	0.164581					26.9985	0.0669993					26.8013	0.0442715					26.8013	0.044332					26.6892	0.0454311					26.8013	0.0225803					26.652	0.0584005
26.9148	0.0659056					26.9148	0.0658469					26.9148	0.0954704					27.0992	0.0319279					26.9013	0.0491443					26.9013	0.0492205					26.7888	0.0488186					26.9013	0.0315173					26.7515	0.0532724
27.0149	0.0276514					27.0149	0.027624					27.0149	0.0491454					27.2	0.0121863					27.0014	0.0531755					27.0014	0.0532488					26.8884	0.0507867					27.0014	0.0408056					26.8509	0.051825
27.1149	0.00988593					27.1149	0.00987575					27.1149	0.0216943					27.3007	0.00375627					27.1014	0.0560834					27.1014	0.0561441					26.988	0.0521045					27.1014	0.0468039					26.9504	0.0535495
27.215	0.00301183					27.215	0.00300887					27.215	0.00744066					27.4015	0.000730789					27.2014	0.0576556					27.2014	0.0577177					27.0875	0.0532469					27.2014	0.0520016					27.0498	0.0580128
27.315	0.000781928					27.315	0.000781244					27.315	0.00171265					27.5022	0.000186995					27.3014	0.0577738					27.3014	0.0578435					27.1871	0.054124					27.3014	0.0510279					27.1493	0.0648513
27.4151	0.00017298					27.4151	0.000173173					27.4151	0.000283202					27.6029	3.29378e-05					27.4014	0.0564289					27.4014	0.0565008					27.2867	0.0542062					27.4014	0.0465583					27.2487	0.073755
27.5151	3.26096e-05					27.5151	3.24698e-05					27.5151	2.26195e-05					27.7037	6.91518e-05					27.5014	0.0537223					27.5014	0.0537733					27.3863	0.0527435					27.5014	0.0397537					27.3482	0.084439
27.6152	5.23801e-06					27.6152	4.91967e-06					27.6152	0					27.8044	8.22143e-05					27.6014	0.0498529					27.6014	0.0499129					27.4859	0.0493584					27.6014	0.0313344					27.4476	0.0966158
27.7152	7.22825e-07					27.7152	9.83935e-07					27.7152	2.56924e-08					27.9052	0.000305816					27.7014	0.0450929					27.7014	0.0451503					27.5855	0.0442997					27.7014	0.0230627					27.5471	0.109962
27.8153	1.28722e-07					27.8153	0					27.8153	7.16878e-08					28.0059	0.00110174					27.8014	0.0397566					27.8014	0.0398212					27.6851	0.0380818					27.8014	0.0160918					27.6465	0.124097
27.9154	3.03652e-07					27.9154	0					27.9154	1.41162e-07					28.1067	0.00230349					27.9014	0.0341655					27.9014	0.0342194					27.7847	0.0314559					27.9014	0.010402					27.746	0.138566
28.0154	1.60078e-06					28.0154	1.96787e-06					28.0154	3.92192e-07					28.2074	0.0029038					28.0014	0.028619					28.0014	0.0286595					27.8842	0.0252697					28.0014	0.00544181					27.8454	0.152841
28.1155	7.38998e-06					28.1155	7.87148e-06					28.1155	1.36066e-06					28.3081	0.00238194					28.1014	0.0233668					28.1014	0.0234144					27.9838	0.0201397					28.1014	0.00255872					27.9449	0.166331
28.2155	2.90879e-05					28.2155	2.9518e-05					28.2155	2.07327e-05					28.4089	0.00151011					28.2014	0.0185963					28.2014	0.0186308					28.0834	0.0164526					28.2014	0.00092925					28.0443	0.178416
28.3156	9.7555e-05					28.3156	9.83935e-05					28.3156	8.75663e-05					28.5096	0.00107606					28.3014	0.0144258					28.3014	0.0144556					28.183	0.0142476					28.3014	0.000426846					28.1437	0.188484
28.4156	0.000278826					28.4156	0.000279437					28.4156	0.000267668					28.6104	0.00138801					28.4014	0.0109076					28.4014	0.0109309					28.2826	0.0129682					28.4014	0.000364472					28.2432	0.195981
28.5157	0.000679079					28.5157	0.000680883					28.5157	0.000655505					28.7111	0.00202293					28.5014	0.00803897					28.5014	0.00805655					28.3822	0.0120117					28.5014	0.000395874					28.3426	0.200461
28.6157	0.00140938					28.6157	0.00141293					28.6157	0.0013228					28.8118	0.00306378					28.6014	0.00577508					28.6014	0.00579065					28.4818	0.0108509					28.6014	0.000791153					28.4421	0.201635
28.7158	0.00249262					28.7158	0.00249723					28.7158	0.00229786					28.9126	0.0043945					28.7014	0.00404382					28.7014	0.00404926					28.5813	0.00790088					28.7014	0.00164487					28.5415	0.199398
28.8159	0.00375713					28.8159	0.00376158					28.8159	0.00331883					29.0133	0.00673681					28.8014	0.00276006					28.8014	0.00276944					28.6809	0.00628538					28.8014	0.00254088					28.641	0.19385
28.9159	0.00482984					28.9159	0.0048321					28.9159	0.00424508					29.1141	0.0112594					28.9014	0.00183622					28.9014	0.00184629					28.7805	0.00518496					28.9014	0.00412528					28.7404	0.185289
29.016	0.00531699					29.016	0.00531718					29.016	0.00497272					29.2148	0.023889					29.0015	0.00119066					29.0015	0.00119589					28.8801	0.00433594					29.0015	0.00753562					28.8399	0.174188
29.116	0.00513421					29.116	0.00513319					29.116	0.00473941					29.3155	0.0487501					29.1015	0.000752631					29.1015	0.000755302					28.9797	0.00367574					29.1015	0.0117037					28.9393	0.161152
29.2161	0.00491759					29.2161	0.00492066					29.2161	0.00525238					29.4163	0.0980566					29.2015	0.000463734					29.2015	0.000461573					29.0793	0.00242025					29.2015	0.0173772					29.0388	0.146864
29.3161	0.00672922					29.3161	0.00675274					29.3161	0.00889111					29.517	0.176343					29.3015	0.000278415					29.3015	0.000272748					29.1789	0.00161044					29.3015	0.0193829					29.1382	0.132028
29.4162	0.0156382					29.4162	0.0157174					29.4162	0.0215948					29.6178	0.283168					29.4015	0.000162981					29.4015	0.000167845					29.2785	0.00184784					29.4015	0.020818					29.2377	0.117304
29.5162	0.0423289					29.5162	0.0425316					29.5162	0.0611907					29.7185	0.417617					29.5015	9.29714e-05					29.5015	8.39224e-05					29.378	0.00192363					29.5015	0.0167604					29.3371	0.103266
29.6163	0.10472					29.6163	0.105141					29.6163	0.142055					29.8192	0.570988					29.6015	5.16646e-05					29.6015	4.19612e-05					29.4776	0.000747145					29.6015	0.0115055					29.4366	0.0903621
29.7164	0.22352					29.7164	0.224235					29.7164	0.274343					29.92	0.713225					29.7015	2.80786e-05					29.7015	2.09806e-05					29.5772	0.000528427					29.7015	0.0134176					29.536	0.0788917
29.8164	0.407399					29.8164	0.40837					29.8164	0.454504					30.0207	0.825851					29.8015	1.48505e-05					29.8015	2.09806e-05					29.6768	0.000609468					29.8015	0.0150675					29.6355	0.0690052
29.9165	0.632989					29.9165	0.633993					29.9165	0.653064					30.1215	0.878051					29.9015	7.61242e-06					29.9015	0					29.7764	0.000575466					29.9015	0.0164432					29.7349	0.0607124
30.0165	0.838116					30.0165	0.838812					30.0165	0.822471					30.2222	0.848791					30.0015	3.86861e-06					30.0015	0					29.876	0.00011634					30.0015	0.0157162					29.8344	0.0539079
30.1166	0.945652					30.1166	0.945743					30.1166	0.910577					30.3229	0.743899					30.1015	1.87191e-06					30.1015	0					29.9756	0.000163095					30.1015	0.0144518					29.9338	0.0483993
30.2166	0.909226					30.2166	0.908671					30.2166	0.886661					30.4237	0.587193					30.2015	8.73556e-07					30.2015	0					30.0751	0.000265423					30.2015	0.0131389					30.0333	0.0439438
30.3167	0.74495					30.3167	0.743988					30.3167	0.757279					30.5244	0.414338					30.3015	3.74381e-07					30.3015	0					30.1747	0.000374771					30.3015	0.0118756					30.1327	0.0402797
30.4167	0.520104					30.4167	0.519097					30.4167	0.564121					30.6252	0.258802					30.4015	2.49588e-07					30.4015	0					30.2743	0.000443585					30.4015	0.0100754					30.2322	0.0371565
30.5168	0.309437					30.5168	0.308643					30.5168	0.363025					30.7259	0.139101					30.5015	1.24794e-07					30.5015	0					30.3739	0.00038763					30.5015	0.00859419					30.3316	0.0343566
30.6168	0.156879					30.6168	0.156383					30.6168	0.198973					30.8267	0.061878					30.6015	0					30.6015	0					30.4735	8.82057e-05					30.6015	0.00918445					30.4311	0.0317095
30.7169	0.0677747					30.7169	0.0675215					30.7169	0.0907385					30.9274	0.0215895					30.7015	0					30.7015	0					30.5731	0					30.7015	0.0116432					30.5305	0.0290987
30.817	0.0249514					30.817	0.0248444					30.817	0.0339108					31.0281	0.00551998					30.8015	0					30.8015	0					30.6727	0					30.8015	0.011283					30.6299	0.026461
30.917	0.00782854					30.917	0.00779079					30.917	0.00990903					31.1289	0.000985816					30.9015	0					30.9015	0					30.7723	3.97774e-07					30.9015	0.00944549					30.7294	0.02378
31.0171	0.002099					31.0171	0.00208791					31.0171	0.0023469					31.2296	0.000330618					31.0016	0					31.0016	0					30.8718	0					31.0016	0.00765336					30.8288	0.0210758
31.1171	0.000505684					31.1171	0.000502791					31.1171	0.000461387					31.3304	0.000169365					31.1016	0					31.1016	0					30.9714	4.37664e-09					31.1016	0.00550877					30.9283	0.0183939
31.2172	0.000202823					31.2172	0.000201707					31.2172	0.000180791					31.4311	0.000339684					31.2016	0					31.2016	0					31.071	1.25047e-09					31.2016	0.00333049					31.0277	0.015793
31.3172	0.000372578					31.3172	0.000370943					31.3172	0.000294569					31.5318	0.00126605					31.3016	0					31.3016	0					31.1706	0					31.3016	0.00180336					31.1272	0.0133357
31.4173	0.000988343					31.4173	0.000984919					31.4173	0.00077358					31.6326	0.00284918					31.4016	0					31.4016	0					31.2702	1.00038e-10					31.4016	0.000639091					31.2266	0.0110801
31.5173	0.00232					31.5173	0.00231323					31.5173	0.00186297					31.7333	0.00593481					31.5016	0					31.5016	0					31.3698	0					31.5016	0.00016821					31.3261	0.00907636
31.6174	0.00464979					31.6174	0.00463925					31.6174	0.00359387					31.8341	0.00869387					31.6016	0					31.6016	0					31.4694	0					31.6016	0.000111013					31.4255	0.00736542
31.7175	0.0079421					31.7175	0.00792756					31.7175	0.00604736					31.9348	0.0107284					31.7016	0					31.7016	0					31.5689	0					31.7016	0.000233183					31.525	0.00598224
31.8175	0.0115598					31.8175	0.0115455					31.8175	0.00848392					32.0355	0.0114285					31.8016	0					31.8016	0					31.6685	0					31.8016	0.000537517					31.6244	0.00496018
31.9176	0.0143377					31.9176	0.014329					31.9176	0.0102511					32.1363	0.0105104					31.9016	0					31.9016	0					31.7681	0					31.9016	0.000971611					31.7239	0.00433918
32.0176	0.0151538					32.0176	0.0151536					32.0176	0.0107819					32.237	0.00902343					32.0016	0					32.0016	0					31.8677	0					32.0016	0.00125232					31.8233	0.00417501
32.1177	0.0136483					32.1177	0.013658					32.1177	0.00989639					32.3378	0.00613208					32.1016	0					32.1016	0					31.9673	0					32.1016	0.00146589					31.9228	0.00454916
32.2177	0.0104748					32.2177	0.0104887					32.2177	0.00802031					32.4385	0.00382485					32.2016	0					32.2016	0					32.0669	0					32.2016	0.00200812					32.0222	0.00557956
32.3178	0.00685048					32.3178	0.00686491					32.3178	0.0057575					32.5392	0.00213572					32.3016	0					32.3016	0					32.1665	0					32.3016	0.00289664					32.1217	0.00742922
32.4178	0.00381784					32.4178	0.00382849					32.4178	0.00368628					32.64	0.000925343					32.4016	0					32.4016	0					32.2661	0					32.4016	0.00435349					32.2211	0.0103129
32.5179	0.00181313					32.5179	0.0018193					32.5179	0.00209361					32.7407	0.0002843					32.5016	0					32.5016	0					32.3656	0					32.5016	0.00562277					32.3206	0.0145005
32.6179	0.000733763					32.6179	0.000736967					32.6179	0.00100941					32.8415	0.000143798					32.6016	0					32.6016	0					32.4652	0					32.6016	0.00681198					32.42	0.0203135
32.718	0.000253035					32.718	0.000254839					32.718	0.000395303					32.9422	9.07044e-05					32.7016	0					32.7016	0					32.5648	0					32.7016	0.00767693					32.5195	0.0281135
32.8181	7.43553e-05					32.8181	7.4779e-05					32.8181	0.000121559					33.0429	0.000131772					32.8016	0					32.8016	0					32.6644	0					32.8016	0.00728009					32.6189	0.0382826
32.9181	1.86185e-05					32.9181	1.86948e-05					32.9181	3.03248e-05					33.1437	0.000363173					32.9016	0					32.9016	0					32.764	0					32.9016	0.00668895					32.7184	0.0511921
33.0182	3.97389e-06					33.0182	3.93574e-06					33.0182	7.94696e-06					33.2444	0.000980054					33.0017	0					33.0017	0					32.8636	0					33.0017	0.00522846					32.8178	0.0671644
33.1182	7.22825e-07					33.1182	9.83935e-07					33.1182	1.80001e-06					33.3452	0.0021902					33.1017	0					33.1017	0					32.9632	0					33.1017	0.00417594					32.9172	0.0864224
33.2183	1.12219e-07					33.2183	0					33.2183	9.67501e-07					33.4459	0.00399654					33.2017	0					33.2017	0					33.0627	0					33.2017	0.00458633					33.0167	0.10904
33.3183	1.32023e-08					33.3183	0					33.3183	8.52407e-08					33.5466	0.00545453					33.3017	0					33.3017	0					33.1623	0					33.3017	0.00539929					33.1161	0.134889
33.4184	3.30057e-09					33.4184	0					33.4184	0					33.6474	0.00582188					33.4017	0					33.4017	0					33.2619	0					33.4017	0.00522868					33.2156	0.163597
33.5184	0					33.5184	0					33.5184	1.79938e-08					33.7481	0.00522315					33.5017	0					33.5017	0					33.3615	0					33.5017	0.00441418					33.315	0.194527
33.6185	0					33.6185	0					33.6185	6.80161e-08					33.8489	0.00368303					33.6017	0					33.6017	0					33.4611	0					33.6017	0.00327542					33.4145	0.22677
33.7186	0					33.7186	0					33.7186	2.036e-07					33.9496	0.00194296					33.7017	0					33.7017	0					33.5607	0					33.7017	0.00217961					33.5139	0.259175
33.8186	0					33.8186	0					33.8186	4.80314e-07					34.0504	0.000570435					33.8017	0					33.8017	0					33.6603	0					33.8017	0.00133471					33.6134	0.290401
33.9187	0					33.9187	0					33.9187	9.27184e-07					34.1511	0.000101573					33.9017	0					33.9017	0					33.7599	0					33.9017	0.00053983					33.7128	0.319007
34.0187	0					34.0187	0					34.0187	1.49427e-06					34.2518	1.17894e-05					34.0017	0					34.0017	0					33.8594	0					34.0017	0.000137513					33.8123	0.343561
34.1188	0					34.1188	0					34.1188	2.03655e-06					34.3526	3.47935e-17					34.1017	0					34.1017	0					33.959	0					34.1017	7.1597e-05					33.9117	0.36275
34.2188	0					34.2188	0					34.2188	2.36602e-06					34.4533	6.75294e-08					34.2017	0					34.2017	0					34.0586	0					34.2017	8.86305e-06					34.0112	0.375506
34.3189	0					34.3189	0					34.3189	2.35382e-06					34.5541	3.47935e-17					34.3017	0					34.3017	0					34.1582	0					34.3017	2.18633e-17					34.1106	0.381098
34.4189	0					34.4189	0					34.4189	2.01075e-06					34.6548	2.78944e-06					34.4017	0					34.4017	0					34.2578	0					34.4017	5.47959e-06					34.2101	0.379206
34.519	0					34.519	0					34.519	1.46469e-06					34.7555	1.50587e-05					34.5017	0					34.5017	0					34.3574	0					34.5017	2.13963e-17					34.3095	0.369958
34.619	3.30057e-09					34.619	0					34.619	8.89489e-07					34.8563	2.72021e-05					34.6017	0					34.6017	0					34.457	0					34.6017	2.13963e-17					34.409	0.353916
34.7191	4.95086e-08					34.7191	0					34.7191	4.72855e-07					34.957	0.000595232					34.7017	0					34.7017	0					34.5565	0					34.7017	2.13963e-17					34.5084	0.332029
34.8192	4.29074e-07					34.8192	0					34.8192	7.58112e-08					35.0578	0.00365468					34.8017	0					34.8017	0					34.6561	0					34.8017	2.23611e-06					34.6079	0.305554
34.9192	3.26426e-06					34.9192	2.9518e-06					34.9192	4.70347e-07					35.1585	0.0106482					34.9017	0					34.9017	0					34.7557	0					34.9017	2.82031e-06					34.7073	0.275948
35.0193	2.11534e-05					35.0193	2.16466e-05					35.0193	0					35.2592	0.0220693					35.0018	0					35.0018	0					34.8553	0					35.0018	2.13963e-17					34.8068	0.244757
35.1193	0.000116817					35.1193	0.000117088					35.1193	4.65025e-05					35.36	0.0403609					35.1018	1.24794e-07					35.1018	0					34.9549	0					35.1018	1.63595e-05					34.9062	0.213511
35.2194	0.000549779					35.2194	0.000551003					35.2194	0.000482259					35.4607	0.0700635					35.2018	3.74381e-07					35.2018	0					35.0545	0					35.2018	4.66916e-06					35.0057	0.183635
35.3194	0.00220488					35.3194	0.00220795					35.3194	0.00254299					35.5615	0.115348					35.3018	7.48763e-07					35.3018	0					35.1541	0					35.3018	1.52735e-05					35.1051	0.156386
35.4195	0.00753477					35.4195	0.00754383					35.4195	0.00978458					35.6622	0.175943					35.4018	1.74711e-06					35.4018	0					35.2537	0					35.4018	2.52942e-05					35.2046	0.132817
35.5195	0.0219417					35.5195	0.0219614					35.5195	0.028964					35.7629	0.246341					35.5018	3.86861e-06					35.5018	0					35.3532	0					35.5018	5.75241e-05					35.304	0.113763
35.6196	0.0544486					35.6196	0.0544844					35.6196	0.0690983					35.8637	0.318151					35.6018	8.36118e-06					35.6018	0					35.4528	0					35.6018	7.17611e-05					35.4034	0.0998551
35.7197	0.115141					35.7197	0.115193					35.7197	0.137401					35.9644	0.377219					35.7018	1.75959e-05					35.7018	2.09806e-05					35.5524	0					35.7018	9.37632e-05					35.5029	0.0915386
35.8197	0.207482					35.8197	0.207537					35.8197	0.232142					36.0652	0.412429					35.8018	3.59406e-05					35.8018	4.19612e-05					35.652	0					35.8018	0.000177869					35.6023	0.0890975
35.9198	0.318593					35.9198	0.318636					35.9198	0.337246					36.1659	0.412333					35.9018	7.16316e-05					35.9018	6.29418e-05					35.7516	0					35.9018	0.000308289					35.7018	0.0926692
36.0198	0.416875					36.0198	0.416883					36.0198	0.424725					36.2666	0.374364					36.0018	0.00013902					36.0018	0.000146864					35.8512	1.25047e-11					36.0018	0.000722612					35.8012	0.102249
36.1199	0.464827					36.1199	0.464794					36.1199	0.465976					36.3674	0.316119					36.1018	0.000262816					36.1018	0.000272748					35.9508	0					36.1018	0.00109829					35.9007	0.117681
36.2199	0.441662					36.2199	0.441602					36.2199	0.446775					36.4681	0.244188					36.2018	0.000484449					36.2018	0.000482554					36.0503	1.12542e-10					36.2018	0.00208577					36.0001	0.138633
36.32	0.3576					36.32	0.357542					36.32	0.374413					36.5689	0.175084					36.3018	0.000870437					36.3018	0.000881186					36.1499	1.75066e-10					36.3018	0.00268593					36.0996	0.164565
36.42	0.246731					36.42	0.246685					36.42	0.272288					36.6696	0.118384					36.4018	0.00152436					36.4018	0.00153158					36.2495	5.11442e-09					36.4018	0.00306493					36.199	0.194705
36.5201	0.145065					36.5201	0.145041					36.5201	0.169647					36.7704	0.0752719					36.5018	0.00260208					36.5018	0.00262258					36.3491	5.5946e-08					36.5018	0.00263769					36.2985	0.228026
36.6201	0.0726806					36.6201	0.0726714					36.6201	0.0891931					36.8711	0.0448129					36.6018	0.00432935					36.6018	0.00434299					36.4487	8.76067e-07					36.6018	0.00143901					36.3979	0.263253
36.7202	0.0310294					36.7202	0.0310274					36.7202	0.0387455					36.9718	0.0225828					36.7018	0.0070214					36.7018	0.00704948					36.5483	3.18667e-05					36.7018	0.000231244					36.4974	0.298898
36.8203	0.0112885					36.8203	0.0112897					36.8203	0.01359					37.0726	0.00797207					36.8018	0.0110995					36.8018	0.0111407					36.6479	0.000210545					36.8018	4.04014e-05					36.5968	0.333314
36.9203	0.00349972					36.9203	0.00349986					36.9203	0.00385027					37.1733	0.00191641					36.9018	0.0171026					36.9018	0.0171831					36.7474	0.000738411					36.9018	2.13963e-17					36.6963	0.3648
37.0204	0.000924576					37.0204	0.000924899					37.0204	0.000943323					37.2741	0.000112769					37.0019	0.0256862					37.0019	0.0257852					36.847	0.0022072					37.0019	7.1869e-06					36.7957	0.391713
37.1204	0.000208147					37.1204	0.000208594					37.1204	0.000202685					37.3748	2.27694e-06					37.1019	0.0376029					37.1019	0.0377231					36.9466	0.00646404					37.1019	2.37952e-05					36.8952	0.412597
37.2205	3.9927e-05					37.2205	4.03413e-05					37.2205	4.13488e-05					37.4755	3.47935e-17					37.2019	0.0536576					37.2019	0.0538153					37.0462	0.0180225					37.2019	2.48107e-05					36.9946	0.42631
37.3205	6.52523e-06					37.3205	6.88754e-06					37.3205	9.45369e-06					37.5763	3.47935e-17					37.3019	0.0746314					37.3019	0.0748378					37.1458	0.044525					37.3019	4.5295e-05					37.0941	0.432123
37.4206	9.07657e-07					37.4206	9.83935e-07					37.4206	4.04277e-06					37.677	3.47935e-17					37.4019	0.101179					37.4019	0.101441					37.2454	0.0921986					37.4019	0.000228435					37.1935	0.429798
37.5206	1.08919e-07					37.5206	0					37.5206	2.18991e-06					37.7778	3.47935e-17					37.5019	0.133703					37.5019	0.134003					37.345	0.159539					37.5019	0.00277173					37.293	0.419609
37.6207	1.32023e-08					37.6207	0					37.6207	1.1831e-06					37.8785	0.000301709					37.6019	0.172215					37.6019	0.172566					37.4446	0.235253					37.6019	0.0113083					37.3924	0.402326
37.7208	9.90171e-09					37.7208	0					37.7208	5.4015e-07					37.9792	0.00141456					37.7019	0.216217					37.7019	0.216604					37.5441	0.301776					37.7019	0.0300006					37.4919	0.379141
37.8208	8.25143e-08					37.8208	0					37.8208	2.07751e-07					38.08	0.00271413					37.8019	0.2646					37.8019	0.265027					37.6437	0.34366					37.8019	0.0612888					37.5913	0.351571
37.9209	7.55831e-07					37.9209	9.83935e-07					37.9209	9.61891e-07					38.1807	0.00387961					37.9019	0.315624					37.9019	0.316094					37.7433	0.354059					37.9019	0.109224					37.6907	0.321318
38.0209	5.7892e-06					38.0209	5.90361e-06					38.0209	5.40608e-06					38.2815	0.00525218					38.0019	0.36697					38.0019	0.367475					37.8429	0.339047					38.0019	0.171561					37.7902	0.290131
38.121	3.77981e-05					38.121	3.73895e-05					38.121	3.89625e-05					38.3822	0.0116378					38.1019	0.415886					38.1019	0.416423					37.9425	0.314246					38.1019	0.244149					37.8896	0.259668
38.221	0.000210296					38.221	0.000209578					38.221	0.000210272					38.4829	0.0322709					38.2019	0.459411					38.2019	0.459958					38.0421	0.296932					38.2019	0.331423					37.9891	0.231376
38.3211	0.00099703					38.3211	0.00099279					38.3211	0.00102084					38.5837	0.0767731					38.3019	0.494665					38.3019	0.495226					38.1417	0.297697					38.3019	0.417111					38.0885	0.206405
38.4211	0.00402787					38.4211	0.00401249					38.4211	0.00425116					38.6844	0.154064					38.4019	0.51916					38.4019	0.519753					38.2412	0.316321					38.4019	0.490203					38.188	0.185545
38.5212	0.0138662					38.5212	0.0138184					38.5212	0.0150206					38.7852	0.269147					38.5019	0.531096					38.5019	0.531691					38.3408	0.344448					38.5019	0.524571					38.2874	0.169204
38.6212	0.0406776					38.6212	0.0405519					38.6212	0.045219					38.8859	0.413425					38.6019	0.529576					38.6019	0.53018					38.4404	0.370215					38.6019	0.509089					38.3869	0.157419
38.7213	0.101691					38.7213	0.101418					38.7213	0.114236					38.9866	0.56421					38.7019	0.514712					38.7019	0.515326					38.54	0.384907					38.7019	0.450876					38.4863	0.149892
38.8214	0.21663					38.8214	0.216139					38.8214	0.240047					39.0874	0.689987					38.8019	0.487621					38.8019	0.48824					38.6396	0.385207					38.8019	0.36025					38.5858	0.14605
38.9214	0.393238					38.9214	0.39254					38.9214	0.421697					39.1881	0.766215					38.9019	0.450281					38.9019	0.450894					38.7392	0.372991					38.9019	0.261496					38.6852	0.145112
39.0215	0.608285					39.0215	0.607506					39.0215	0.6294					39.2889	0.768916					39.002	0.405291					39.002	0.405891					38.8388	0.35277					39.002	0.171285					38.7847	0.146173
39.1215	0.801816					39.1215	0.801205					39.1215	0.807661					39.3896	0.707297					39.102	0.355577					39.102	0.356146					38.9384	0.326214					39.102	0.100226					38.8841	0.148281
39.2216	0.900653					39.2216	0.900461					39.2216	0.898044					39.4904	0.597572					39.202	0.304074					39.202	0.304617					39.0379	0.292069					39.202	0.0515555					38.9836	0.150518
39.3216	0.862085					39.3216	0.8624					39.3216	0.868299					39.5911	0.456287					39.302	0.253458					39.302	0.25397					39.1375	0.2503					39.302	0.022675					39.083	0.152061
39.4217	0.703165					39.4217	0.703843					39.4217	0.730012					39.6918	0.319628					39.402	0.205929					39.402	0.206386					39.2371	0.205073					39.402	0.00857338					39.1825	0.152242
39.5217	0.488742					39.5217	0.489521					39.5217	0.531337					39.7926	0.203392					39.502	0.163085					39.502	0.163481					39.3367	0.16291					39.502	0.00324336					39.2819	0.150583
39.6218	0.289485					39.6218	0.290136					39.6218	0.331565					39.8933	0.118838					39.602	0.12589					39.602	0.12624					39.4363	0.128063					39.602	0.001604					39.3814	0.146815
39.7219	0.146131					39.7219	0.14656					39.7219	0.174709					39.9941	0.0613816					39.702	0.0947207					39.702	0.0950002					39.5359	0.101085					39.702	0.00137348					39.4808	0.140884
39.8219	0.0629529					39.8219	0.0631834					39.8219	0.0769169					40.0948	0.0323464					39.802	0.0694675					39.802	0.0696976					39.6355	0.081281					39.802	0.00160456					39.5803	0.132932
39.922	0.0234273					39.922	0.0235269					39.922	0.0280951					40.1955	0.0218467					39.902	0.0496597					39.902	0.0498499					39.735	0.0688337					39.902	0.00121135					39.6797	0.123266
40.022	0.00834123					40.022	0.00837328					40.022	0.00984386					40.2963	0.0221034					40.002	0.0346027					40.002	0.0347439					39.8346	0.0641315					40.002	0.0008161					39.7792	0.112322
40.1221	0.00473985					40.1221	0.0047406					40.1221	0.00526227					40.397	0.0245716					40.102	0.0235017					40.102	0.0236032					39.9342	0.0657721					40.102	0.000377293					39.8786	0.10062
40.2221	0.00635671					40.2221	0.00634048					40.2221	0.00718541					40.4978	0.0246998					40.202	0.0155583					40.202	0.0156306					40.0338	0.0700975					40.202	7.18657e-05					39.978	0.088715
40.3222	0.0106625					40.3222	0.0106373					40.3222	0.0121197					40.5985	0.0238692					40.302	0.0100394					40.302	0.0100917					40.1334	0.0725398					40.302	1.53715e-05					40.0775	0.077167
40.4222	0.016117					40.4222	0.0160893					40.4222	0.0179424					40.6992	0.0222449					40.402	0.00631457					40.402	0.00635712					40.233	0.0701371					40.402	2.32467e-05					40.1769	0.0665052
40.5223	0.0209033					40.5223	0.020883					40.5223	0.0228844					40.8	0.0227736					40.502	0.00387135					40.502	0.00390239					40.3326	0.0620243					40.502	7.62692e-06					40.2764	0.0572104
40.6223	0.0231785					40.6223	0.0231746					40.6223	0.0238793					40.9007	0.0277672					40.602	0.00231343					40.602	0.00232885					40.4321	0.0491808					40.602	2.18666e-06					40.3758	0.0497084
40.7224	0.0221444					40.7224	0.0221582					40.7224	0.0225038					41.0015	0.0369248					40.702	0.00134752					40.702	0.00136374					40.5317	0.03417					40.702	1.31169e-05					40.4753	0.0443697
40.8225	0.0188602					40.8225	0.0188876					40.8225	0.0183402					41.1022	0.0476066					40.802	0.000764986					40.802	0.000776282					40.6313	0.020138					40.802	1.65654e-06					40.5747	0.0415176
40.9225	0.0161194					40.9225	0.0161513					40.9225	0.0158403					41.2029	0.0617905					40.902	0.000423425					40.902	0.000419612					40.7309	0.0103437					40.902	1.6919e-05					40.6742	0.0414351
41.0226	0.0175756					41.0226	0.0176075					41.0226	0.0170458					41.3037	0.0786329					41.0021	0.000228373					41.0021	0.000230787					40.8305	0.00459257					41.0021	1.19967e-05					40.7736	0.0443713
41.1226	0.0265688					41.1226	0.0265997					41.1226	0.0261421					41.4044	0.093918					41.1021	0.000120052					41.1021	0.000125884					40.9301	0.0017601					41.1021	6.32284e-05					40.8731	0.0505428
41.2227	0.0446401					41.2227	0.0446736					41.2227	0.0438228					41.5052	0.101053					41.2021	6.15233e-05					41.2021	6.29418e-05					41.0297	0.00103042					41.2021	0.000125794					40.9725	0.0601261
41.3227	0.0697542					41.3227	0.0697875					41.3227	0.0682373					41.6059	0.101649					41.3021	3.06993e-05					41.3021	2.09806e-05					41.1293	0.00102188					41.3021	0.000771812					41.072	0.0732414
41.4228	0.0954016					41.4228	0.0954308					41.4228	0.0925496					41.7066	0.091482					41.4021	1.49753e-05					41.4021	2.09806e-05					41.2288	0.00107157					41.4021	0.00201506					41.1714	0.0899309
41.5228	0.112439					41.5228	0.112453					41.5228	0.108634					41.8074	0.0774074					41.5021	7.11325e-06					41.5021	0					41.3284	0.000415678					41.5021	0.00368603					41.2709	0.110135
41.6229	0.113745					41.6229	0.113739					41.6229	0.109058					41.9081	0.0616255					41.6021	3.24464e-06					41.6021	0					41.428	0					41.6021	0.00563213					41.3703	0.133666
41.723	0.0986414					41.723	0.0986168					41.723	0.0927702					42.0089	0.048091					41.7021	1.49753e-06					41.7021	0					41.5276	0.000289977					41.7021	0.00754145					41.4698	0.160195
41.823	0.0732823					41.823	0.073251					41.823	0.0660087					42.1096	0.0351571					41.8021	7.48763e-07					41.8021	0					41.6272	0.000710637					41.8021	0.0089809					41.5692	0.189235
41.9231	0.0466153					41.9231	0.0465864					41.9231	0.0389834					42.2104	0.0226939					41.9021	3.74381e-07					41.9021	0					41.7268	0.000979692					41.9021	0.00969881					41.6687	0.220156
42.0231	0.0253762					42.0231	0.025356					42.0231	0.0192226					42.3111	0.0117742					42.0021	3.74381e-07					42.0021	0					41.8264	0.000643212					42.0021	0.00857789					41.7681	0.252204
42.1232	0.0118164					42.1232	0.0118052					42.1232	0.00799118					42.4118	0.00357213					42.1021	7.48763e-07					42.1021	0					41.9259	8.35566e-05					42.1021	0.00830452					41.8676	0.284535
42.2232	0.00470432					42.2232	0.00469927					42.2232	0.00276187					42.5126	0.000680594					42.2021	1.62232e-06					42.2021	0					42.0255	4.77444e-05					42.2021	0.00960453					41.967	0.316261
42.3233	0.00160063					42.3233	0.00159889					42.3233	0.000660223					42.6133	3.68436e-05					42.3021	3.36943e-06					42.3021	0					42.1251	0.000212392					42.3021	0.00966797					42.0665	0.346495
42.4233	0.000465291					42.4233	0.000464417					42.4233	0					42.7141	1.10639e-05					42.4021	6.86366e-06					42.4021	0					42.2247	0.000317048					42.4021	0.00831311					42.1659	0.374397
42.5234	0.000115513					42.5234	0.00011512					42.5234	7.96847e-06					42.8148	3.47935e-17					42.5021	1.38521e-05					42.5021	2.09806e-05					42.3243	0.000301592					42.5021	0.0063724					42.2653	0.399222
42.6234	2.44836e-05					42.6234	2.45984e-05					42.6234	1.72094e-06					42.9155	3.47935e-17					42.6021	2.7205e-05					42.6021	2.09806e-05					42.4239	8.88796e-05					42.6021	0.00465781					42.3648	0.420335
42.7235	4.42937e-06					42.7235	3.93574e-06					42.7235	3.08468e-08					43.0163	9.18706e-05					42.7021	5.21638e-05					42.7021	6.29418e-05					42.5235	9.42628e-06					42.7021	0.00416195					42.4642	0.437231
42.8236	6.83218e-07					42.8236	9.83935e-07					42.8236	1.06877e-06					43.117	0.000312384					42.8021	9.75887e-05					42.8021	0.000104903					42.6231	1.14364e-05					42.8021	0.00455681					42.5637	0.449533
42.9236	8.91154e-08					42.9236	0					42.9236	4.21228e-07					43.2178	0.000200394					42.9021	0.000177831					42.9021	0.000188825					42.7226	2.53332e-05					42.9021	0.00708007					42.6631	0.456989
43.0237	9.90171e-09					43.0237	0					43.0237	1.04549e-06					43.3185	0.000335573					43.0022	0.000315853					43.0022	0.000314709					42.8222	8.92572e-05					43.0022	0.0116233					42.7626	0.459459
43.1237	0					43.1237	0					43.1237	1.60645e-06					43.4192	0.000209225					43.1022	0.000546846					43.1022	0.000545496					42.9218	0.000383984					43.1022	0.0169476					42.862	0.456907
43.2238	3.30057e-09					43.2238	0					43.2238	2.35764e-06					43.52	6.24316e-05					43.2022	0.00092285					43.2022	0.000923147					43.0214	0.000976905					43.2022	0.021415					42.9615	0.449395
43.3238	2.97051e-08					43.3238	0					43.3238	2.77014e-06					43.6207	1.58824e-05					43.3022	0.00151787					43.3022	0.00153158					43.121	0.00177677					43.3022	0.0244164					43.0609	0.437093
43.4239	2.60745e-07					43.4239	0					43.4239	2.91593e-06					43.7215	0.000126486					43.4022	0.0024336					43.4022	0.00245473					43.2206	0.00276857					43.4022	0.0272966					43.1604	0.420277
43.5239	2.00675e-06					43.5239	1.96787e-06					43.5239	3.41188e-06					43.8222	0.000327401					43.5022	0.00380322					43.5022	0.00381847					43.3202	0.0040982					43.5022	0.0280092					43.2598	0.399345
43.624	1.32023e-05					43.624	1.27912e-05					43.624	1.31509e-05					43.9229	0.00289135					43.6022	0.0057933					43.6022	0.00581163					43.4197	0.00627547					43.6022	0.0271105					43.3593	0.374817
43.7241	7.40747e-05					43.7241	7.37951e-05					43.7241	7.90043e-05					44.0237	0.0135151					43.7022	0.00860191					43.7022	0.00864401					43.5193	0.0105663					43.7022	0.0234097					43.4587	0.34733
43.8241	0.000354161					43.8241	0.000354216					43.8241	0.000383554					44.1244	0.0435362					43.8022	0.0124492					43.8022	0.0125044					43.6189	0.0183012					43.8022	0.019764					43.5582	0.317629
43.9242	0.00144284					43.9242	0.00144245					43.9242	0.00168708					44.2252	0.09439					43.9022	0.0175615					43.9022	0.0176237					43.7185	0.0313521					43.9022	0.013857					43.6576	0.28653
44.0242	0.00500899					44.0242	0.00500626					44.0242	0.00587646					44.3259	0.154016					44.0022	0.0241472					44.0022	0.0242326					43.8181	0.0503944					44.0022	0.0104671					43.7571	0.254885
44.1243	0.0148183					44.1243	0.0148092					44.1243	0.0169113					44.4266	0.22185					44.1022	0.0323634					44.1022	0.032457					43.9177	0.073032					44.1022	0.0047836					43.8565	0.223528
44.2243	0.0373572					44.2243	0.0373354					44.2243	0.0415762					44.5274	0.277494					44.2022	0.0422794					44.2022	0.0424018					44.0173	0.0936591					44.2022	0.00287086					43.956	0.193232
44.3244	0.0802529					44.3244	0.0802074					44.3244	0.0873853					44.6281	0.312466					44.3022	0.0538374					44.3022	0.0539621					44.1169	0.105668					44.3022	0.00273616					44.0554	0.164666
44.4244	0.146909					44.4244	0.146838					44.4244	0.156837					44.7289	0.315482					44.4022	0.0668218					44.4022	0.0669701					44.2164	0.105219					44.4022	0.00433014					44.1549	0.13836
44.5245	0.229169					44.5245	0.22908					44.5245	0.240399					44.8296	0.29632					44.5022	0.0808415					44.5022	0.0810061					44.316	0.0939803					44.5022	0.00891625					44.2543	0.114681
44.6246	0.304649					44.6246	0.304565					44.6246	0.313557					44.9303	0.266042					44.6022	0.0953308					44.6022	0.0955037					44.4156	0.0782346					44.6022	0.0263273					44.3538	0.0938382
44.7246	0.345191					44.7246	0.345146					44.7246	0.350607					45.0311	0.239333					44.7022	0.109576					44.7022	0.10975					44.5152	0.0662638					44.7022	0.0573269					44.4532	0.0758879
44.8247	0.333672					44.8247	0.333685					44.8247	0.336944					45.1318	0.230425					44.8022	0.122767					44.8022	0.122946					44.6148	0.0641156					44.8022	0.0980686					44.5526	0.0607609
44.9247	0.276371					44.9247	0.276427					44.9247	0.279216					45.2326	0.243809					44.9022	0.134069					44.9022	0.134255					44.7144	0.0720594					44.9022	0.133454					44.6521	0.0482885
45.0248	0.200276					45.0248	0.200336					45.0248	0.203165					45.3333	0.283204					45.0023	0.142711					45.0023	0.142899					44.814	0.0850552					45.0023	0.159936					44.7515	0.0382356
45.1248	0.138808					45.1248	0.138815					45.1248	0.141304					45.4341	0.339878					45.1023	0.148072					45.1023	0.148249					44.9135	0.0963468					45.1023	0.167071					44.851	0.0303341
45.2249	0.118456					45.2249	0.118355					45.2249	0.121227					45.5348	0.395519					45.2023	0.149752					45.2023	0.149927					45.0131	0.101465					45.2023	0.159447					44.9504	0.0243078
45.3249	0.152894					45.3249	0.152641					45.3249	0.15907					45.6355	0.431729					45.3023	0.147624					45.3023	0.147787					45.1127	0.100721					45.3023	0.141362					45.0499	0.0198944
45.425	0.2402					45.425	0.239808					45.425	0.253597					45.7363	0.438183					45.4023	0.141851					45.4023	0.141997					45.2123	0.0976704					45.4023	0.116104					45.1493	0.016857
45.525	0.358889					45.525	0.358442					45.525	0.379399					45.837	0.411135					45.5023	0.132863					45.5023	0.133017					45.3119	0.0954801					45.5023	0.0884807					45.2488	0.0149904
45.6251	0.46848					45.6251	0.468131					45.6251	0.492616					45.9378	0.359019					45.6023	0.121305					45.6023	0.121457					45.4115	0.0946733					45.6023	0.0621479					45.3482	0.014122
45.7252	0.523842					45.7252	0.523737					45.7252	0.550348					46.0385	0.292709					45.7023	0.107962					45.7023	0.108092					45.5111	0.0930459					45.7023	0.0407681					45.4477	0.0141078
45.8252	0.499672					45.8252	0.49986					45.8252	0.530965					46.1392	0.221891					45.8023	0.0936707					45.8023	0.0938043					45.6107	0.087698					45.8023	0.0236454					45.5471	0.0148274
45.9253	0.406236					45.9253	0.406633					45.9253	0.44286					46.24	0.156869					45.9023	0.0792362					45.9023	0.0793487					45.7102	0.077757					45.9023	0.0131587					45.6466	0.016178
46.0253	0.281455					46.0253	0.281908					46.0253	0.318214					46.3407	0.102239					46.0023	0.0653575					46.0023	0.0654595					45.8098	0.0652967					46.0023	0.00623913					45.746	0.0180702
46.1254	0.16618					46.1254	0.166557					46.1254	0.194801					46.4415	0.0617766					46.1023	0.0525814					46.1023	0.0526823					45.9094	0.0534125					46.1023	0.00252369					45.8455	0.020426
46.2254	0.0836401					46.2254	0.0838873					46.2254	0.0995384					46.5422	0.0349617					46.2023	0.0412778					46.2023	0.0413528					46.009	0.0440935					46.2023	0.000850498					45.9449	0.0231798
46.3255	0.0359829					46.3255	0.0361163					46.3255	0.0414589					46.6429	0.0199919					46.3023	0.031642					46.3023	0.0317227					46.1086	0.0372632					46.3023	0.000316902					46.0444	0.0262818
46.4255	0.0135244					46.4255	0.0135832					46.4255	0.0142884					46.7437	0.0130408					46.4023	0.0237133					46.4023	0.023771					46.2082	0.0314828					46.4023	0.000149265					46.1438	0.0297031
46.5256	0.00518107					46.5256	0.00520501					46.5256	0.00505561					46.8444	0.010921					46.5023	0.0174071					46.5023	0.0174559					46.3078	0.0255781					46.5023	0.000100884					46.2433	0.0334413
46.6257	0.00349469					46.6257	0.00350674					46.6257	0.00324396					46.9452	0.00980146					46.6023	0.0125548					46.6023	0.0125884					46.4073	0.0197453					46.6023	0.000142789					46.3427	0.0375255
46.7257	0.00473646					46.7257	0.00474552					46.7257	0.00446208					47.0459	0.00980423					46.7023	0.00893935					46.7023	0.00895872					46.5069	0.0151486					46.7023	0.000278561					46.4422	0.0420164
46.8258	0.00717194					46.8258	0.00717977					46.8258	0.00677016					47.1466	0.00915802					46.8023	0.00632892					46.8023	0.00635712					46.6065	0.0130144					46.8023	0.000352885					46.5416	0.0470037
46.9258	0.00963751					46.9258	0.00964354					46.9258	0.0092176					47.2474	0.00861459					46.9023	0.00449944					46.9023	0.00451083					46.7061	0.0137209					46.9023	0.000590782					46.6411	0.0525952
47.0259	0.0110921					47.0259	0.0110929					47.0259	0.0108415					47.3481	0.00767662					47.0024	0.00325125					47.0024	0.00327297					46.8057	0.0164702					47.0024	0.000958647					46.7405	0.0589032
47.1259	0.0108854					47.1259	0.0108813					47.1259	0.0105473					47.4489	0.00636669					47.1024	0.00241751					47.1024	0.00243375					46.9053	0.0196675					47.1024	0.00107348					46.84	0.0660222
47.226	0.00910382					47.226	0.00909648					47.226	0.00871922					47.5496	0.00594771					47.2024	0.00186617					47.2024	0.00186727					47.0049	0.0216925					47.2024	0.00147778					46.9394	0.0740045
47.326	0.00648815					47.326	0.00648019					47.326	0.00587721					47.6503	0.00530842					47.3024	0.00149827					47.3024	0.0015106					47.1045	0.021534					47.3024	0.00172142					47.0388	0.0828371
47.4261	0.00394025					47.4261	0.00393377					47.4261	0.00315347					47.7511	0.0049724					47.4024	0.00124369					47.4024	0.00123786					47.204	0.0190534					47.4024	0.00138251					47.1383	0.0924213
47.5261	0.00203915					47.5261	0.00203478					47.5261	0.00136582					47.8518	0.00347451					47.5024	0.00105538					47.5024	0.00104903					47.3036	0.0149349					47.5024	0.00125695					47.2377	0.102558
47.6262	0.000899237					47.6262	0.000897348					47.6262	0.000475669					47.9526	0.00178275					47.6024	0.000904131					47.6024	0.000902166					47.4032	0.0103336					47.6024	0.000560306					47.3372	0.112946
47.7263	0.000337929					47.7263	0.00033749					47.7263	0.000137791					48.0533	0.000752314					47.7024	0.000773347					47.7024	0.000776282					47.5028	0.00632854					47.7024	0.000234736					47.4366	0.123195
47.8263	0.000108216					47.8263	0.000108233					47.8263	2.41921e-05					48.154	0.000172384					47.8024	0.000654918					47.8024	0.000650399					47.6024	0.0034422					47.8024	0.000112632					47.5361	0.132846
47.9264	2.95368e-05					47.9264	2.9518e-05					47.9264	0					48.2548	3.32586e-05					47.9024	0.000545973					47.9024	0.000545496					47.702	0.00171125					47.9024	8.65665e-05					47.6355	0.141411
48.0264	6.9279e-06					48.0264	6.88754e-06					48.0264	1.80773e-06					48.3555	8.0979e-06					48.0024	0.000446387					48.0024	0.000440593					47.8016	0.000861174					48.0024	6.84293e-05					47.735	0.148414
48.1265	1.78231e-06					48.1265	1.96787e-06					48.1265	1.10841e-06					48.4563	4.89082e-05					48.1024	0.000357035					48.1024	0.00035667					47.9011	0.000525783					48.1024	0.000100991					47.8344	0.153441
48.2265	2.63386e-06					48.2265	2.9518e-06					48.2265	2.61905e-06					48.557	0.000178224					48.2024	0.000279039					48.2024	0.000272748					48.0007	0.000419346					48.2024	0.000148824					47.9339	0.156185
48.3266	1.17632e-05					48.3266	1.18072e-05					48.3266	1.36211e-05					48.6578	0.000718067					48.3024	0.000212773					48.3024	0.000209806					48.1003	0.000373229					48.3024	0.000372381					48.0333	0.156484
48.4266	4.87593e-05					48.4266	4.91967e-05					48.4266	6.72164e-05					48.7585	0.00196836					48.4024	0.000158363					48.4024	0.000167845					48.1999	0.000311307					48.4024	0.00076886					48.1328	0.154339
48.5267	0.000172676					48.5267	0.000173173					48.5267	0.000239209					48.8592	0.00519088					48.5024	0.000114935					48.5024	0.000104903					48.2995	0.00024603					48.5024	0.00148813					48.2322	0.149928
48.6268	0.00052117					48.6268	0.000523453					48.6268	0.000703103					48.96	0.0101693					48.6024	8.12407e-05					48.6024	8.39224e-05					48.3991	0.000204811					48.6024	0.00219602					48.3317	0.143586
48.7268	0.00134036					48.7268	0.00134504					48.7268	0.00174872					49.0607	0.0144139					48.7024	5.60324e-05					48.7024	6.29418e-05					48.4987	0.000184115					48.7024	0.00244924					48.4311	0.135782
48.8269	0.00293753					48.8269	0.0029459					48.8269	0.00366811					49.1615	0.0181178					48.8024	3.76877e-05					48.8024	4.19612e-05					48.5982	0.000191564					48.8024	0.00236806					48.5306	0.127074
48.9269	0.00548611					48.9269	0.00549823					48.9269	0.00648142					49.2622	0.0196518					48.9024	2.47092e-05					48.9024	2.09806e-05					48.6978	0.000192355					48.9024	0.00208423					48.63	0.118055
49.027	0.00873073					49.027	0.00874324					49.027	0.0098347					49.3629	0.0187876					49.0025	1.5724e-05					49.0025	2.09806e-05					48.7974	0.000165263					49.0025	0.00165456					48.7295	0.109307
49.127	0.0118401					49.127	0.0118495					49.127	0.0127623					49.4637	0.0161359					49.1025	9.85871e-06					49.1025	0					48.897	0.00013499					49.1025	0.00125562					48.8289	0.101342
49.2271	0.0136826					49.2271	0.0136846					49.2271	0.0139186					49.5644	0.0132722					49.2025	5.9901e-06					49.2025	0					48.9966	0.000137346					49.2025	0.000954792					48.9284	0.0945648
49.3271	0.013474					49.3271	0.0134681					49.3271	0.0127085					49.6652	0.0106099					49.3025	3.49423e-06					49.3025	0					49.0962	0.00014588					49.3025	0.000893619					49.0278	0.0892439
49.4272	0.0113068					49.4272	0.0112946					49.4272	0.00976623					49.7659	0.00966457					49.4025	1.9967e-06					49.4025	0					49.1958	0.000156939					49.4025	0.00081686					49.1273	0.0854962
49.5272	0.00808619					49.5272	0.00807318					49.5272	0.00630685					49.8666	0.0087879					49.5025	1.12314e-06					49.5025	0					49.2954	0.000160253					49.5025	0.00102438					49.2267	0.0832899
49.6273	0.0049331					49.6273	0.00492263					49.6273	0.00346837					49.9674	0.0113087					49.6025	6.23969e-07					49.6025	0					49.3949	0.000138757					49.6025	0.00100377					49.3261	0.082461
49.7274	0.00259407					49.7274	0.00258676					49.7274	0.00179008					50.0681	0.0182137					49.7025	3.74381e-07					49.7025	0					49.4945	9.87191e-05					49.7025	0.00130706					49.4256	0.0827415
49.8274	0.00130245					49.8274	0.00129781					49.8274	0.000842002					50.1689	0.0315426					49.8025	1.24794e-07					49.8025	0					49.5941	6.18343e-05					49.8025	0.00148329					49.525	0.0837965
49.9275	0.00111886					49.9275	0.00111381					49.9275	0.000764679					50.2696	0.0555284					49.9025	1.24794e-07					49.9025	0					49.6937	3.33084e-05					49.9025	0.00151919					49.6245	0.0852646
50.0275	0.00253794					50.0275	0.00252576					50.0275	0.00207724					50.3703	0.0885944					50.0025	0					50.0025	0					49.7933	1.3737e-05					50.0025	0.00127281					49.7239	0.0867977
50.1276	0.00716313					50.1276	0.00713254					50.1276	0.00633132					50.4711	0.126031					50.1025	0					50.1025	0					49.8929	7.05733e-06					50.1025	0.00103543					49.8234	0.0880955
50.2276	0.018125					50.2276	0.0180601					50.2276	0.0178387					50.5718	0.159785					50.2025	0					50.2025	0					49.9925	9.15903e-06					50.2025	0.000665536					49.9228	0.0889308
50.3277	0.0395247					50.3277	0.0394125					50.3277	0.0416097					50.6726	0.184687					50.3025	0					50.3025	0					50.092	1.86074e-05					50.3025	0.000571496					50.0223	0.0891648
50.4277	0.0741441					50.4277	0.073986					50.4277	0.08125					50.7733	0.195555					50.4025	0					50.4025	0					50.1916	3.11809e-05					50.4025	0.000575968					50.1217	0.0887491
50.5278	0.119896					50.5278	0.119725					50.5278	0.133854					50.874	0.191105					50.5025	0					50.5025	0					50.2912	3.91153e-05					50.5025	0.000520214					50.2212	0.0877182
50.6279	0.167608					50.6279	0.167479					50.6279	0.186598					50.9748	0.171996					50.6025	0					50.6025	0					50.3908	3.65955e-05					50.6025	0.000568511					50.3206	0.0861716
50.7279	0.203164					50.7279	0.203134					50.7279	0.22393					51.0755	0.146137					50.7025	0					50.7025	0					50.4904	2.67954e-05					50.7025	0.000437453					50.4201	0.0842508
50.828	0.214169					50.828	0.214249					50.828	0.234509					51.1763	0.114747					50.8025	0					50.8025	0					50.59	1.66786e-05					50.8025	0.000416801					50.5195	0.0821137
50.928	0.196839					50.928	0.196993					50.928	0.215375					51.277	0.0831947					50.9025	0					50.9025	0					50.6896	9.4377e-06					50.9025	0.000585033					50.619	0.0799112
51.0281	0.157996					51.0281	0.158166					51.0281	0.173221					51.3778	0.0577205					51.0026	0					51.0026	0					50.7892	3.24888e-06					51.0026	0.00070663					50.7184	0.0777694
51.1281	0.110816					51.1281	0.110954					51.1281	0.12169					51.4785	0.0372912					51.1026	0					51.1026	0					50.8887	3.76867e-07					51.1026	0.00105798					50.8179	0.0757763
51.2282	0.0678726					51.2282	0.0679614					51.2282	0.0741781					51.5792	0.021507					51.2026	0					51.2026	0					50.9883	0					51.2026	0.00166502					50.9173	0.0739795
51.3282	0.036237					51.3282	0.0362836					51.3282	0.038994					51.68	0.0117618					51.3026	1.24794e-07					51.3026	0					51.0879	1.49181e-08					51.3026	0.00188123					51.0168	0.0723884
51.4283	0.0168207					51.4283	0.016842					51.4283	0.017658					51.7807	0.0050185					51.4026	2.49588e-07					51.4026	0					51.1875	1.00913e-08					51.4026	0.00204017					51.1162	0.070985
51.5284	0.00676885					51.5284	0.00677636					51.5284	0.00673716					51.8815	0.00211023					51.5026	4.99175e-07					51.5026	0					51.2871	0					51.5026	0.00228843					51.2157	0.0697357
51.6284	0.00235523					51.6284	0.00235751					51.6284	0.00217888					51.9822	0.00167176					51.6026	9.9835e-07					51.6026	0					51.3867	7.56534e-09					51.6026	0.00239229					51.3151	0.0686046
51.7285	0.000713233					51.7285	0.000714337					51.7285	0.000664985					52.0829	0.00377563					51.7026	2.12149e-06					51.7026	0					51.4863	1.30424e-08					51.7026	0.00281348					51.4146	0.0675653
51.8285	0.00021929					51.8285	0.000219417					51.8285	0.000157951					52.1837	0.00919674					51.8026	4.36778e-06					51.8026	0					51.5858	4.07653e-09					51.8026	0.00309005					51.514	0.0666078
51.9286	0.00019648					51.9286	0.000196787					51.9286	0.000180817					52.2844	0.0169485					51.9026	8.61077e-06					51.9026	0					51.6854	0					51.9026	0.00311879					51.6135	0.0657409
52.0286	0.000568025					52.0286	0.000569698					52.0286	0.000522321					52.3852	0.0275824					52.0026	1.64728e-05					52.0026	2.09806e-05					51.785	1.90196e-08					52.0026	0.00323907					51.7129	0.0649909
52.1287	0.00172975					52.1287	0.00173369					52.1287	0.00152246					52.4859	0.0386329					52.1026	3.08241e-05					52.1026	2.09806e-05					51.8846	0					52.1026	0.00275973					51.8123	0.0643932
52.2287	0.00458307					52.2287	0.00459104					52.2287	0.00416217					52.5866	0.0500826					52.2026	5.6282e-05					52.2026	6.29418e-05					51.9842	0					52.2026	0.00229768					51.9118	0.0639848
52.3288	0.0104382					52.3288	0.0104543					52.3288	0.0095912					52.6874	0.057285					52.3026	9.9835e-05					52.3026	0.000104903					52.0838	4.16281e-07					52.3026	0.00175479					52.0112	0.063794
52.4288	0.0204083					52.4288	0.0204334					52.4288	0.0193361					52.7881	0.0602823					52.4026	0.000172839					52.4026	0.000167845					52.1834	0					52.4026	0.00129428					52.1107	0.0638328
52.5289	0.0342227					52.5289	0.0342537					52.5289	0.0335426					52.8889	0.0564636					52.5026	0.000291518					52.5026	0.000293729					52.283	6.40932e-06					52.5026	0.00121245					52.2101	0.0640917
52.629	0.0491847					52.629	0.0492135					52.629	0.0497261					52.9896	0.0492189					52.6026	0.000479333					52.6026	0.000482554					52.3825	6.63172e-05					52.6026	0.00156788					52.3096	0.0645398
52.729	0.0605365					52.729	0.0605523					52.729	0.0629573					53.0903	0.0390883					52.7026	0.000768106					52.7026	0.000776282					52.4821	0.000294666					52.7026	0.00169763					52.409	0.065128
52.8291	0.0637651					52.8291	0.06376					52.8291	0.068034					53.1911	0.0297473					52.8026	0.00120002					52.8026	0.00121688					52.5817	0.000852239					52.8026	0.00216705					52.5085	0.0657968
52.9291	0.0574452					52.9291	0.0574224					52.9291	0.0624447					53.2918	0.0212092					52.9026	0.00182711					52.9026	0.00184629					52.6813	0.00217339					52.9026	0.00263912					52.6079	0.0664863
53.0292	0.0442375					53.0292	0.0442062					53.0292	0.0482981					53.3926	0.0150237					53.0027	0.00271177					53.0027	0.00272748					52.7809	0.00506437					53.0027	0.00195558					52.7074	0.0671456
53.1292	0.0291057					53.1292	0.0290772					53.1292	0.0314508					53.4933	0.00954888					53.1027	0.00392302					53.1027	0.00394435					52.8805	0.0102926					53.1027	0.00200646					52.8068	0.0677423
53.2293	0.0163572					53.2293	0.0163363					53.2293	0.0171268					53.594	0.00606617					53.2027	0.00553186					53.2027	0.00555986					52.9801	0.017526					53.2027	0.00219283					52.9063	0.0682675
53.3293	0.00785918					53.3293	0.00784688					53.3293	0.0078621					53.6948	0.00438298					53.3027	0.00760319					53.3027	0.00763694					53.0796	0.0252116					53.3027	0.00238602					53.0057	0.0687378
53.4294	0.00326452					53.4294	0.00325879					53.4294	0.00303583					53.7955	0.00478481					53.4027	0.0101862					53.4027	0.0102385					53.1792	0.031028					53.4027	0.00313179					53.1052	0.0691921
53.5295	0.00128909					53.5295	0.00128699					53.5295	0.00111444					53.8963	0.00730374					53.5027	0.0133015					53.5027	0.0133437					53.2788	0.033095					53.5027	0.00358337					53.2046	0.0696849
53.6295	0.000784407					53.6295	0.000784196					53.6295	0.000686696					53.997	0.00932948					53.6027	0.0169308					53.6027	0.0169943					53.3784	0.0307976					53.6027	0.00450692					53.3041	0.0702781
53.7296	0.00111856					53.7296	0.00111873					53.7296	0.000947079					54.0978	0.0117419					53.7027	0.0210055					53.7027	0.0210645					53.478	0.0250001					53.7027	0.00526128					53.4035	0.0710305
53.8296	0.00204864					53.8296	0.00204954					53.8296	0.00185615					54.1985	0.0141369					53.8027	0.0254023					53.8027	0.0254705					53.5776	0.0178065					53.8027	0.00748858					53.503	0.071989
53.9297	0.00343645					53.9297	0.00343688					53.9297	0.00326326					54.2992	0.0185304					53.9027	0.029943					53.9027	0.0300233					53.6772	0.0118838					53.9027	0.0104857					53.6024	0.073183
54.0297	0.00507817					54.0297	0.00507809					54.0297	0.00501581					54.4	0.0231889					54.0027	0.0344031					54.0027	0.0344711					53.7768	0.0095313					54.0027	0.0166822					53.7019	0.074619
54.1298	0.00681519					54.1298	0.00681276					54.1298	0.00709371					54.5007	0.0290449					54.1027	0.0385288					54.1027	0.0386043					53.8763	0.0117182					54.1027	0.0244836					53.8013	0.0762811
54.2298	0.00888906					54.2298	0.00888198					54.2298	0.00942998					54.6015	0.0341288					54.2027	0.0420584					54.2027	0.0421291					53.9759	0.0170249					54.2027	0.0321297					53.9008	0.0781315
54.3299	0.0121885					54.3299	0.0121752					54.3299	0.012993					54.7022	0.037258					54.3027	0.0447509					54.3027	0.0448146					54.0755	0.0230166					54.3027	0.040322					54.0002	0.080114
54.4299	0.0178848					54.4299	0.0178633					54.4299	0.0191749					54.8029	0.0386919					54.4027	0.0464124					54.4027	0.046472					54.1751	0.0273267					54.4027	0.0440151					54.0996	0.0821564
54.53	0.026347					54.53	0.0263193					54.53	0.0282054					54.9037	0.0384794					54.5027	0.046919					54.5027	0.0469756					54.2747	0.0286593					54.5027	0.0450714					54.1991	0.0841739
54.6301	0.0360662					54.6301	0.0360376					54.6301	0.0384172					55.0044	0.0361495					54.6027	0.0462322					54.6027	0.0462832					54.3743	0.0272602					54.6027	0.0419004					54.2985	0.0860712
54.7301	0.043775					54.7301	0.0437566					54.7301	0.04653					55.1052	0.0335204					54.7027	0.0444041					54.7027	0.0444369					54.4739	0.0245832					54.7027	0.0366543					54.398	0.087745
54.8302	0.0461912					54.8302	0.0461898					54.8302	0.0488491					55.2059	0.0320565					54.8027	0.0415703					54.8027	0.0416045					54.5734	0.0226384					54.8027	0.0288011					54.4974	0.0890866
54.9302	0.0422012					54.9302	0.0422167					54.9302	0.0446018					55.3066	0.0323778					54.9027	0.0379337					54.9027	0.0379539					54.673	0.0225543					54.9027	0.0205823					54.5969	0.089987
55.0303	0.0336368					55.0303	0.0336614					55.0303	0.0356464					55.4074	0.03451					55.0028	0.0337404					55.0028	0.0337578					54.7726	0.0241407					55.0028	0.0147051					54.6963	0.0903422
55.1303	0.0240707					55.1303	0.0240946					55.1303	0.0255134					55.5081	0.0396677					55.1028	0.029252					55.1028	0.0292679					54.8722	0.0260508					55.1028	0.00895018					54.7958	0.0900638
55.2304	0.0169364					55.2304	0.0169483					55.2304	0.0179242					55.6089	0.0447876					55.2028	0.0247198					55.2028	0.0247361					54.9718	0.0264059					55.2028	0.0048857					54.8952	0.0890891
55.3304	0.0145136					55.3304	0.0145091					55.3304	0.0152794					55.7096	0.0504979					55.3028	0.0203619					55.3028	0.0203722					55.0714	0.0243846					55.3028	0.00270818					54.9947	0.0873927
55.4305	0.017915					55.4305	0.0178919					55.4305	0.0188271					55.8103	0.0532999					55.4028	0.0163481					55.4028	0.0163649					55.171	0.0204346					55.4028	0.00118822					55.0941	0.0849962
55.5306	0.0270467					55.5306	0.027008					55.5306	0.0287435					55.9111	0.052991					55.5028	0.0127939					55.5028	0.0127982					55.2706	0.0160387					55.5028	0.000522791					55.1936	0.0819766
55.6306	0.0400228					55.6306	0.0399783					55.6306	0.0429757					56.0118	0.0496747					55.6028	0.00975925					55.6028	0.00977696					55.3701	0.0125137					55.6028	0.000454811					55.293	0.0784663
55.7307	0.0528453					55.7307	0.0528107					55.7307	0.057139					56.1126	0.0442617					55.7028	0.00725638					55.7028	0.00725929					55.4697	0.0105059					55.7028	0.000705242					55.3925	0.0746496
55.8307	0.0605631					55.8307	0.0605533					55.8307	0.0655808					56.2133	0.038207					55.8028	0.00525893					55.8028	0.00526613					55.5693	0.00978914					55.8028	0.000734276					55.4919	0.0707509
55.9308	0.0597842					55.9308	0.0598036					55.9308	0.0647144					56.314	0.0332074					55.9028	0.00371499					55.9028	0.00371357					55.6689	0.00932419					55.9028	0.00130772					55.5914	0.0670158
56.0308	0.0507214					56.0308	0.0507622					56.0308	0.0547618					56.4148	0.0277626					56.0028	0.00255802					56.0028	0.00255963					55.7685	0.00843978					56.0028	0.00205008					55.6908	0.0636911
56.1309	0.0369622					56.1309	0.0370097					56.1309	0.0393739					56.5155	0.0253345					56.1028	0.00171691					56.1028	0.00172041					55.8681	0.00703558					56.1028	0.00270873					55.7903	0.0609984
56.2309	0.0231532					56.2309	0.0231923					56.2309	0.0240011					56.6163	0.0269205					56.2028	0.00112327					56.2028	0.00113295					55.9677	0.00535721					56.2028	0.00297638					55.8897	0.0591111
56.331	0.0125694					56.331	0.0125963					56.331	0.0121464					56.717	0.0318118					56.3028	0.000716441					56.3028	0.000713341					56.0672	0.00380667					56.3028	0.00260806					55.9892	0.0581356
56.431	0.0063016					56.431	0.00631883					56.431	0.00527003					56.8178	0.0378277					56.4028	0.000445514					56.4028	0.000440593					56.1668	0.00280453					56.4028	0.00167505					56.0886	0.0580962
56.5311	0.00409411					56.5311	0.00410891					56.5311	0.00327419					56.9185	0.0445848					56.5028	0.000270553					56.5028	0.000272748					56.2664	0.00263719					56.5028	0.000567432					56.1881	0.0589315
56.6312	0.00567146					56.6312	0.00569108					56.6312	0.00467602					57.0192	0.0503375					56.6028	0.000161109					56.6028	0.000167845					56.366	0.00320257					56.6028	0.000438136					56.2875	0.0604976
56.7312	0.0113958					56.7312	0.0114274					56.7312	0.00948335					57.12	0.0519028					56.7028	9.53424e-05					56.7028	0.000104903					56.4656	0.00420984					56.7028	0.000251411					56.3869	0.062581
56.8313	0.0217383					56.8313	0.0217833					56.8313	0.0201378					57.2207	0.0509229					56.8028	5.85283e-05					56.8028	6.29418e-05					56.5652	0.00534173					56.8028	0.000344515					56.4864	0.0649195
56.9313	0.0358681					56.9313	0.0359205					56.9313	0.0353609					57.3215	0.0479509					56.9028	4.16811e-05					56.9028	4.19612e-05					56.6648	0.00628824					56.9028	0.000629024					56.5858	0.067228
57.0314	0.0505307					57.0314	0.0505733					57.0314	0.0515131					57.4222	0.044854					57.0029	4.01836e-05					57.0029	4.19612e-05					56.7643	0.00678653					57.0029	0.000727557					56.6853	0.0692271
57.1314	0.0606892					57.1314	0.0607048					57.1314	0.0636865					57.5229	0.0422866					57.1029	5.34117e-05					57.1029	6.29418e-05					56.8639	0.00666527					57.1029	0.000850487					56.7847	0.0706708
57.2315	0.0621631					57.2315	0.0621453					57.2315	0.0666938					57.6237	0.0421004					57.2029	8.4735e-05					57.2029	8.39224e-05					56.9635	0.00593132					57.2029	0.00117467					56.8842	0.0713701
57.3315	0.054432					57.3315	0.054388					57.3315	0.0594647					57.7244	0.0445654					57.3029	0.000141267					57.3029	0.000146864					57.0631	0.00473939					57.3029	0.00172626					56.9836	0.0712099
57.4316	0.0411501					57.4316	0.041097					57.4316	0.0458383					57.8252	0.0519614					57.4029	0.000234987					57.4029	0.000230787					57.1627	0.00336876					57.4029	0.00254418					57.0831	0.0701584
57.5317	0.0279573					57.5317	0.0279113					57.5317	0.0316067					57.9259	0.0612199					57.5029	0.000383741					57.5029	0.000377651					57.2623	0.00217516					57.5029	0.00394134					57.1825	0.068266
57.6317	0.0196031					57.6317	0.0195754					57.6317	0.022064					58.0266	0.0719432					57.6029	0.000612238					57.6029	0.000608438					57.3619	0.00131552					57.6029	0.00480728					57.282	0.0656567
57.7318	0.0185467					57.7318	0.0185422					57.7318	0.02089					58.1274	0.0794027					57.7029	0.000952551					57.7029	0.000965108					57.4615	0.00101786					57.7029	0.00441275					57.3814	0.0625126
57.8318	0.0252088					57.8318	0.025232					57.8318	0.0290456					58.2281	0.0816451					57.8029	0.00144486					57.8029	0.00144766					57.561	0.00243259					57.8029	0.00384684					57.4809	0.0590542
57.9319	0.038552					57.9319	0.0386066					57.9319	0.0452123					58.3289	0.0771525					57.9029	0.00213634					57.9029	0.00214002					57.6606	0.00621779					57.9029	0.00260013					57.5803	0.0555174
58.0319	0.0559756					58.0319	0.0560538					58.0319	0.0658523					58.4296	0.067964					58.0029	0.00307879					58.0029	0.00308415					57.7602	0.0119948					58.0029	0.00202299					57.6798	0.0521355
58.132	0.0729579					58.132	0.0730355					58.132	0.0849391					58.5303	0.0567918					58.1029	0.00432498					58.1029	0.00434299					57.8598	0.0179797					58.1029	0.00143383					57.7792	0.0491196
58.232	0.0837771					58.232	0.0838243					58.232	0.095987					58.6311	0.0454882					58.2029	0.00592196					58.2029	0.00593751					57.9594	0.0224396					58.2029	0.00104067					57.8787	0.0466491
58.3321	0.0839347					58.3321	0.0839316					58.3321	0.0941147					58.7318	0.035094					58.3029	0.00790381					58.3029	0.00790969					58.059	0.0241512					58.3029	0.000975311					57.9781	0.0448622
58.4321	0.0728679					58.4321	0.0728171					58.4321	0.0796763					58.8326	0.0261346					58.4029	0.0102823					58.4029	0.0103015					58.1586	0.0226876					58.4029	0.00118524					58.0776	0.0438561
58.5322	0.0545369					58.5322	0.0544618					58.5322	0.0573766					58.9333	0.0185087					58.5029	0.0130385					58.5029	0.0130499					58.2581	0.0186863					58.5029	0.00175831					58.177	0.0436868
58.6323	0.0350575					58.6323	0.0349867					58.6323	0.0343802					59.034	0.0132367					58.6029	0.0161156					58.6029	0.0161341					58.3577	0.0135082					58.6029	0.00305084					58.2765	0.0443731
58.7323	0.0193058					58.7323	0.0192546					58.7323	0.0167214					59.1348	0.00900592					58.7029	0.0194157					58.7029	0.019449					58.4573	0.00843693					58.7029	0.00534125					58.3759	0.0459004
58.8324	0.00909138					58.8324	0.00906204					58.8324	0.0064593					59.2355	0.00718482					58.8029	0.0228006					58.8029	0.0228269					58.5569	0.00500781					58.8029	0.00887693					58.4754	0.0482235
58.9324	0.0036567					58.9324	0.00364253					58.9324	0.00203017					59.3363	0.00733139					58.9029	0.0260995					58.9029	0.0261209					58.6565	0.00463334					58.9029	0.0141478					58.5748	0.0512694
59.0325	0.0012563					59.0325	0.00125058					59.0325	0.000500447					59.437	0.0110713					59.003	0.0291215					59.003	0.029163					58.7561	0.00741875					59.003	0.0205702					58.6742	0.0549368
59.1325	0.000374578					59.1325	0.000372911					59.1325	0					59.5377	0.0175749					59.103	0.0316735					59.103	0.0317017					58.8557	0.0120666					59.103	0.0271468					58.7737	0.0590984
59.2326	0.000129151					59.2326	0.000128895					59.2326	0					59.6385	0.0292375					59.203	0.0335808					59.203	0.0336109					58.9553	0.0164433					59.203	0.0328654					58.8731	0.0636005
59.3326	0.000189585					59.3326	0.000189899					59.3326	3.80875e-05					59.7392	0.0445797					59.303	0.0347065					59.303	0.0347439					59.0548	0.0192352					59.303	0.0363415					58.9726	0.0682682
59.4327	0.000669623					59.4327	0.000669076					59.4327	0.000279222					59.84	0.0632212					59.403	0.0349687					59.403	0.0350166					59.1544	0.0197643					59.403	0.036434					59.072	0.07291
59.5328	0.00224424					59.5328	0.00224337					59.5328	0.00132351					59.9407	0.0830642					59.503	0.0343501					59.503	0.0343872					59.254	0.0181036					59.503	0.0334293					59.1715	0.077326
59.6328	0.00649047					59.6328	0.00648511					59.6328	0.00495042					60.0415	0.100684					59.603	0.0329005					59.603	0.0329396					59.3536	0.0157226					59.603	0.0282868					59.2709	0.0813196
59.7329	0.0160996					59.7329	0.0160873					59.7329	0.0148733					60.1422	0.111732					59.703	0.030731					59.703	0.0307786					59.4532	0.0141353					59.703	0.021252					59.3704	0.0847085
59.8329	0.034205					59.8329	0.0341789					59.8329	0.0361957					60.2429	0.116825					59.803	0.0279997					59.803	0.0280511					59.5528	0.0142204					59.803	0.0149617					59.4698	0.0873371
59.933	0.062182					59.933	0.0621384					59.933	0.0705062					60.3437	0.113433					59.903	0.0248935					59.903	0.0249459					59.6524	0.015712					59.903	0.00933501					59.5693	0.0890847
60.033	0.09664					60.033	0.096585					60.033	0.112784					60.4444	0.102459					60.003	0.0216077					60.003	0.021652					59.7519	0.0177028					60.003	0.00578832					59.6687	0.0898731
60.1331	0.128316					60.1331	0.128265					60.1331	0.149975					60.5452	0.0892267					60.103	0.0183251					60.103	0.018358					59.8515	0.018953					60.103	0.00404113					59.7682	0.089668
60.2331	0.145476					60.2331	0.145449					60.2331	0.169189					60.6459	0.0729715					60.203	0.0152018					60.203	0.0152319					59.9511	0.0185104					60.203	0.00299488					59.8676	0.0884787
60.3332	0.140767					60.3332	0.140776					60.3332	0.162803					60.7466	0.0566503					60.303	0.0123551					60.303	0.0123786					60.0507	0.0162008					60.303	0.00232103					59.9671	0.0863519
60.4333	0.116214					60.4333	0.116254					60.4333	0.133517					60.8474	0.042518					60.403	0.00985983					60.403	0.00988187					60.1503	0.0130759					60.403	0.00215637					60.0665	0.0833659
60.5333	0.081836					60.5333	0.0818899					60.5333	0.0925723					60.9481	0.0296164					60.503	0.00775044					60.503	0.00778381					60.2499	0.0101106					60.503	0.00215373					60.166	0.0796215
60.6334	0.0491435					60.6334	0.0491938					60.6334	0.053816					61.0489	0.020098					60.603	0.00602517					60.603	0.00604242					60.3495	0.00799856					60.603	0.0028333					60.2654	0.0752348
60.7334	0.0251669					60.7334	0.0252015					60.7334	0.0258227					61.1496	0.0138364					60.703	0.00465606					60.703	0.00467868					60.4491	0.00700823					60.703	0.00324358					60.3649	0.07033
60.8335	0.0110062					60.8335	0.011026					60.8335	0.010227					61.2503	0.010945					60.803	0.00359743					60.803	0.00360866					60.5486	0.00687535					60.803	0.00447729					60.4643	0.0650339
60.9335	0.00417692					60.9335	0.00418566					60.9335	0.00346114					61.3511	0.0106081					60.903	0.00279538					60.903	0.0028114					60.6482	0.00695163					60.903	0.00550151					60.5638	0.0594726
61.0336	0.00160167					61.0336	0.0016048					61.0336	0.00118165					61.4518	0.0123494					61.0031	0.00219562					61.0031	0.00220296					60.7478	0.00659026					61.0031	0.00638198					60.6632	0.0537696
61.1336	0.00123274					61.1336	0.00123385					61.1336	0.000784103					61.5526	0.0147951					61.1031	0.00174799					61.1031	0.00176237					60.8474	0.00557212					61.1031	0.00570064					60.7627	0.0480425
61.2337	0.0022525					61.2337	0.00225223					61.2337	0.00186088					61.6533	0.0156362					61.2031	0.00141054					61.2031	0.0014057					60.947	0.00417954					61.2031	0.00517868					60.8621	0.0424034
61.3337	0.00457099					61.3337	0.00457038					61.3337	0.0039888					61.754	0.0161516					61.3031	0.00115022					61.3031	0.00115393					61.0466	0.00273973					61.3031	0.00410479					60.9615	0.0369557
61.4338	0.0081443					61.4338	0.00814206					61.4338	0.00701234					61.8548	0.0156155					61.4031	0.000943191					61.4031	0.000944127					61.1462	0.00157085					61.4031	0.00290941					61.061	0.0317924
61.5339	0.0124005					61.5339	0.0123976					61.5339	0.0111423					61.9555	0.0145812					61.5031	0.000773097					61.5031	0.000776282					61.2457	0.000949398					61.5031	0.0011739					61.1604	0.0269959
61.6339	0.0160939					61.6339	0.0160913					61.6339	0.0147415					62.0563	0.0147236					61.6031	0.000629834					61.6031	0.000629418					61.3453	0.000998321					61.6031	0.000993584					61.2599	0.0226333
61.734	0.0177995					61.734	0.0177974					61.734	0.0158172					62.157	0.015621					61.7031	0.000507287					61.7031	0.000503535					61.4449	0.00167363					61.7031	0.000974772					61.3593	0.0187585
61.834	0.016777					61.834	0.0167771					61.834	0.0144217					62.2577	0.0198444					61.8031	0.00040246					61.8031	0.000398632					61.5445	0.00270743					61.8031	0.000800174					61.4588	0.0154098
61.9341	0.0134851					61.9341	0.0134868					61.9341	0.011259					62.3585	0.0276723					61.9031	0.000313482					61.9031	0.000314709					61.6441	0.00377911					61.9031	0.000659423					61.5582	0.0126118
62.0341	0.00928663					62.0341	0.00928933					62.0341	0.00738267					62.4592	0.0385237					62.0031	0.000239105					62.0031	0.000230787					61.7437	0.00458429					62.0031	0.00045632					61.6577	0.0103778
62.1342	0.00566367					62.1342	0.00566845					62.1342	0.00420233					62.56	0.0514387					62.1031	0.000178455					62.1031	0.000188825					61.8433	0.00495994					62.1031	0.000410446					61.7571	0.00871114
62.2342	0.00371878					62.2342	0.00372616					62.2342	0.00266498					62.6607	0.0647247					62.2031	0.00013016					62.2031	0.000125884					61.9429	0.00484538					62.2031	0.000714208					61.8566	0.00760963
62.3343	0.00438358					62.3343	0.00440016					62.3343	0.00305443					62.7614	0.0750816					62.3031	9.2597e-05					62.3031	8.39224e-05					62.0424	0.00428157					62.3031	0.00180887					61.956	0.00706692
62.4344	0.009017					62.4344	0.00905023					62.4344	0.00730587					62.8622	0.0803609					62.4031	6.43936e-05					62.4031	6.29418e-05					62.142	0.00341178					62.4031	0.00300865					62.0555	0.00707395
62.5344	0.0195436					62.5344	0.0196039					62.5344	0.0183373					62.9629	0.0798138					62.5031	4.3553e-05					62.5031	4.19612e-05					62.2416	0.00242886					62.5031	0.00447189					62.1549	0.00761958
62.6345	0.0373578					62.6345	0.0374446					62.6345	0.0390231					63.0637	0.0752894					62.6031	2.88274e-05					62.6031	2.09806e-05					62.3412	0.00152224					62.6031	0.00432232					62.2544	0.0086892
62.7345	0.0611435					62.7345	0.061243					62.7345	0.067002					63.1644	0.0672012					62.7031	1.85943e-05					62.7031	2.09806e-05					62.4408	0.000815401					62.7031	0.00324392					62.3538	0.0102614
62.8346	0.0853355					62.8346	0.0854164					62.8346	0.0946556					63.2652	0.0587023					62.8031	1.16058e-05					62.8031	2.09806e-05					62.5404	0.000357101					62.8031	0.00112246					62.4533	0.0123045
62.9346	0.101509					62.9346	0.101537					62.9346	0.11245					63.3659	0.0494374					62.9031	7.11325e-06					62.9031	0					62.64	0.000124329					62.9031	0.000122743					62.5527	0.0147731
63.0347	0.102926					63.0347	0.102891					63.0347	0.113691					63.4666	0.0405909					63.0032	4.24299e-06					63.0032	0					62.7395	4.84575e-05					63.0032	8.91008e-06					62.6522	0.0176042
63.1347	0.0890337					63.1347	0.0889516					63.1347	0.0980887					63.5674	0.0340717					63.1032	2.49588e-06					63.1032	0					62.8391	2.65636e-05					63.1032	2.13963e-17					62.7516	0.0207153
63.2348	0.0659098					63.2348	0.0658124					63.2348	0.0719355					63.6681	0.028112					63.2032	1.37273e-06					63.2032	0					62.9387	1.60605e-05					63.2032	2.13963e-17					62.8511	0.0240055
63.3348	0.0422682					63.3348	0.0421872					63.3348	0.044848					63.7689	0.0239015					63.3032	7.48763e-07					63.3032	0					63.0383	1.5732e-05					63.3032	2.13963e-17					62.9505	0.0273589
63.4349	0.0246088					63.4349	0.024559					63.4349	0.0246424					63.8696	0.0210705					63.4032	4.99175e-07					63.4032	0					63.1379	2.63858e-05					63.4032	1.00457e-05					63.05	0.0306513
63.535	0.0151141					63.535	0.0150936					63.535	0.0145317					63.9703	0.0187253					63.5032	2.49588e-07					63.5032	0					63.2375	4.45329e-05					63.5032	4.83856e-05					63.1494	0.0337592
63.635	0.0126022					63.635	0.0126003					63.635	0.0123497					64.0711	0.0163926					63.6032	3.74381e-07					63.6032	0					63.3371	6.18133e-05					63.6032	6.24684e-05					63.2489	0.0365722
63.7351	0.01447					63.7351	0.0144766					63.7351	0.0148729					64.1718	0.0142162					63.7032	4.99175e-07					63.7032	0					63.4367	7.67653e-05					63.7032	9.27179e-05					63.3483	0.0390044
63.8351	0.0179531					63.8351	0.0179588					63.8351	0.0188671					64.2726	0.0122609					63.8032	9.9835e-07					63.8032	0					63.5362	8.87916e-05					63.8032	0.000539775					63.4477	0.0410069
63.9352	0.0206517					63.9352	0.0206528					63.9352	0.0220046					64.3733	0.0102154					63.9032	1.9967e-06					63.9032	0					63.6358	9.07076e-05					63.9032	0.00173221					63.5472	0.0425765
64.0352	0.0209585					64.0352	0.0209519					64.0352	0.022667					64.474	0.00836616					64.0032	4.11819e-06					64.0032	0					63.7354	8.03617e-05					64.0032	0.00300689					63.6466	0.0437617
64.1353	0.0185171					64.1353	0.0185058					64.1353	0.0200944					64.5748	0.00663586					64.1032	8.36118e-06					64.1032	0					63.835	6.19153e-05					64.1032	0.00368625					63.7461	0.0446635
64.2353	0.0142456					64.2353	0.0142326					64.2353	0.0153763					64.6755	0.00524389					64.2032	1.6348e-05					64.2032	2.09806e-05					63.9346	4.03842e-05					64.2032	0.00377502					63.8455	0.045431
64.3354	0.00966604					64.3354	0.00965437					64.3354	0.0102042					64.7763	0.00411053					64.3032	3.10736e-05					64.3032	2.09806e-05					64.0342	2.4114e-05					64.3032	0.0038736					63.945	0.0462519
64.4355	0.00598795					64.4355	0.00598036					64.4355	0.00597738					64.877	0.00325128					64.4032	5.76547e-05					64.4032	6.29418e-05					64.1338	2.75865e-05					64.4032	0.00304753					64.0444	0.0473373
64.5355	0.00361043					64.5355	0.00360612					64.5355	0.00325935					64.9777	0.00258719					64.5032	0.000104328					64.5032	0.000104903					64.2333	4.93861e-05					64.5032	0.00288452					64.1439	0.0489048
64.6356	0.00227307					64.6356	0.00227092					64.6356	0.00183215					65.0785	0.00166673					64.6032	0.000183821					64.6032	0.000188825					64.3329	8.75482e-05					64.6032	0.0027051					64.2433	0.0511583
64.7356	0.00151338					64.7356	0.00151329					64.7356	0.00111364					65.1792	0.000976828					64.7032	0.000315853					64.7032	0.000314709					64.4325	0.000224348					64.7032	0.00249407					64.3428	0.0542667
64.8357	0.00100283					64.8357	0.00100263					64.8357	0.000613576					65.28	0.000573984					64.8032	0.000528876					64.8032	0.000524515					64.5321	0.00063301					64.8032	0.00263571					64.4422	0.0583473
64.9357	0.000615048					64.9357	0.000614959					64.9357	0.000296094					65.3807	0.000319256					64.9032	0.000863448					64.9032	0.000881186					64.6317	0.00164801					64.9032	0.00283176					64.5417	0.0634471
65.0358	0.00033349					65.0358	0.000333554					65.0358	0.000132393					65.4814	0.000177473					65.0033	0.00137385					65.0033	0.00138472					64.7313	0.00420235					65.0033	0.0036532					64.6411	0.0695349
65.1358	0.000156414					65.1358	0.000156446					65.1358	5.28478e-05					65.5822	9.41014e-05					65.1033	0.00213098					65.1033	0.00214002					64.8309	0.00966334					65.1033	0.00441561					64.7406	0.0764952
65.2359	6.28957e-05					65.2359	6.29718e-05					65.2359	1.81548e-05					65.6829	3.32005e-05					65.2033	0.00322143					65.2033	0.00325199					64.9304	0.0189226					65.2033	0.00456496					64.84	0.0841265
65.3359	2.16022e-05					65.3359	2.16466e-05					65.3359	5.23433e-06					65.7837	3.91206e-05					65.3033	0.00474703					65.3033	0.00478358					65.03	0.031398					65.3033	0.00426659					64.9395	0.0921571
65.436	6.3536e-06					65.436	5.90361e-06					65.436	1.58997e-06					65.8844	6.45611e-05					65.4033	0.00681823					65.4033	0.00686066					65.1296	0.0435858					65.4033	0.00415039					65.0389	0.100251
65.5361	1.7526e-06					65.5361	1.96787e-06					65.5361	7.88071e-07					65.9852	0.000161811					65.5033	0.0095456					65.5033	0.00958814					65.2292	0.0520024					65.5033	0.00343556					65.1384	0.108037
65.6361	1.32023e-06					65.6361	9.83935e-07					65.6361	1.08065e-06					66.0859	0.000310052					65.6033	0.0130265					65.6033	0.0130919					65.3288	0.0539353					65.6033	0.0029581					65.2378	0.115128
65.7362	4.79903e-06					65.7362	4.91967e-06					65.7362	2.21316e-06					66.1866	0.00106855					65.7033	0.0173266					65.7033	0.0173929					65.4284	0.0491323					65.7033	0.00256467					65.3373	0.121151
65.8362	1.95394e-05					65.8362	1.96787e-05					65.8362	7.31986e-06					66.2874	0.00213954					65.8033	0.0224646					65.8033	0.0225542					65.528	0.0389325					65.8033	0.00263879					65.4367	0.125777
65.9363	6.89159e-05					65.9363	6.88754e-05					65.9363	2.79971e-05					66.3881	0.00375147					65.9033	0.0283897					65.9033	0.0284917					65.6276	0.0262242					65.9033	0.00319259					65.5362	0.128743
66.0363	0.000208467					66.0363	0.00020761					66.0363	0.000102463					66.4889	0.00568775					66.0033	0.0349706					66.0033	0.0350796					65.7271	0.0144409					66.0033	0.00571463					65.6356	0.129876
66.1364	0.000541601					66.1364	0.00054018					66.1364	0.000311068					66.5896	0.00840995					66.1033	0.0419889					66.1033	0.0421081					65.8267	0.00709855					66.1033	0.0101627					65.735	0.129102
66.2364	0.0012115					66.2364	0.00120827					66.2364	0.000847787					66.6903	0.0112838					66.2033	0.04914					66.2033	0.0492625					65.9263	0.00541761					66.2033	0.0190414					65.8345	0.126459
66.3365	0.00234537					66.3365	0.00234176					66.3365	0.00193835					66.7911	0.0150375					66.3033	0.0560569					66.3033	0.0561861					66.0259	0.00915735					66.3033	0.0306185					65.9339	0.122084
66.4366	0.00396612					66.4366	0.0039623					66.4366	0.00370763					66.8918	0.0188525					66.4033	0.0623305					66.4033	0.0624383					66.1255	0.0172091					66.4033	0.0451298					66.0334	0.116212
66.5366	0.00596704					66.5366	0.00596461					66.5366	0.00610193					66.9926	0.0216042					66.5033	0.0675545					66.5033	0.0676625					66.2251	0.0276336					66.5033	0.0596366					66.1328	0.109147
66.6367	0.00825073					66.6367	0.00825226					66.6367	0.00885434					67.0933	0.0235373					66.6033	0.0713661					66.6033	0.07146					66.3247	0.0375081					66.6033	0.0721598					66.2323	0.101245
66.7367	0.0109747					66.7367	0.0109817					66.7367	0.0121416					67.194	0.0230414					66.7033	0.0734868					66.7033	0.073579					66.4242	0.0441693					66.7033	0.0779038					66.3317	0.0928839
66.8368	0.0146019					66.8368	0.0146144					66.8368	0.0164354					67.2948	0.0221085					66.8033	0.0737581					66.8033	0.0738308					66.5238	0.0456071					66.8033	0.0776526					66.4312	0.0844329
66.9368	0.019453					66.9368	0.0194681					66.9368	0.0219433					67.3955	0.0196108					66.9033	0.0721593					66.9033	0.0722362					66.6234	0.041973					66.9033	0.0701211					66.5306	0.0762347
67.0369	0.0249645					67.0369	0.0249782					67.0369	0.0280091					67.4963	0.0168568					67.0034	0.0688109					67.0034	0.0688584					66.723	0.0348386					67.0034	0.0579481					66.6301	0.068579
67.1369	0.0294133					67.1369	0.0294206					67.1369	0.0321569					67.597	0.0142171					67.1034	0.0639591					67.1034	0.0640118					66.8226	0.0274219					67.1034	0.0448137					66.7295	0.0616907
67.237	0.0307165					67.237	0.0307155					67.237	0.0323788					67.6977	0.0122784					67.2034	0.0579475					67.2034	0.0579904					66.9222	0.023098					67.2034	0.0325658					66.829	0.0557246
67.3371	0.0278689					67.3371	0.0278611					67.3371	0.027775					67.7985	0.0103453					67.3034	0.0511732					67.3034	0.0512137					67.0218	0.0247109					67.3034	0.0233711					66.9284	0.0507602
67.4371	0.0217489					67.4371	0.0217391					67.4371	0.0200776					67.8992	0.0105348					67.4034	0.044049					67.4034	0.0440803					67.1214	0.030895					67.4034	0.0162868					67.0279	0.0468139
67.5372	0.0145381					67.5372	0.0145288					67.5372	0.0122092					68	0.01137					67.5034	0.0369583					67.5034	0.0369888					67.2209	0.0379532					67.5034	0.0116707					67.1273	0.0438453
67.6372	0.00834636					67.6372	0.00833983					67.6372	0.00602698					68.1007	0.0138636					67.6034	0.0302248					67.6034	0.030254					67.3205	0.0422658					67.6034	0.0083608					67.2268	0.0417735
67.7373	0.00426042					67.7373	0.00425552					67.7373	0.00246612					68.2014	0.0172822					67.7034	0.0240942					67.7034	0.0241067					67.4201	0.0416042					67.7034	0.00613394					67.3262	0.0404923
67.8373	0.00237628					67.8373	0.00237227					67.8373	0.00119143					68.3022	0.0208161					67.8034	0.0187211					67.8034	0.0187357					67.5197	0.0364688					67.8034	0.00500686					67.4257	0.0398848
67.9374	0.00242078					67.9374	0.00241458					67.9374	0.00147742					68.4029	0.0260816					67.9034	0.0141789					67.9034	0.0141829					67.6193	0.0284993					67.9034	0.00372028					67.5251	0.0398371
68.0374	0.00422329					68.0374	0.00421222					68.0374	0.00250406					68.5037	0.0335126					68.0034	0.0104678					68.0034	0.0104693					67.7189	0.0201609					68.0034	0.00320063					67.6246	0.0402481
68.1375	0.00766816					68.1375	0.00765108					68.1375	0.00471631					68.6044	0.043833					68.1034	0.00753318					68.1034	0.00755302					67.8185	0.013979					68.1034	0.0024108					67.724	0.0410363
68.2375	0.0122632					68.2375	0.0122441					68.2375	0.00868822					68.7051	0.0578284					68.2034	0.00528614					68.2034	0.00528711					67.918	0.0117687					68.2034	0.00186075					67.8235	0.0421418
68.3376	0.0168584					68.3376	0.016841					68.3376	0.0129094					68.8059	0.076109					68.3034	0.00361815					68.3034	0.00362965					68.0176	0.0124517					68.3034	0.00139451					67.9229	0.0435259
68.4377	0.0200399					68.4377	0.0200309					68.4377	0.0159292					68.9066	0.0948942					68.4034	0.0024195					68.4034	0.00243375					68.1172	0.0141705					68.4034	0.00105707					68.0224	0.0451659
68.5377	0.0212442					68.5377	0.0212441					68.5377	0.0175048					69.0074	0.114317					68.5034	0.001587					68.5034	0.00159453					68.2168	0.0150021					68.5034	0.000818424					68.1218	0.0470497
68.6378	0.0218808					68.6378	0.0218847					68.6378	0.0187937					69.1081	0.12901					68.6034	0.00103229					68.6034	0.00102805					68.3164	0.0140958					68.6034	0.000589934					68.2212	0.0491686
68.7378	0.025509					68.7378	0.0255046					68.7378	0.0225674					69.2089	0.140422					68.7034	0.000685243					68.7034	0.00069236					68.416	0.0117631					68.7034	0.000398088					68.3207	0.0515079
68.8379	0.0365555					68.8379	0.0365355					68.8379	0.0344567					69.3096	0.143446					68.8034	0.000494183					68.8034	0.000503535					68.5156	0.00857122					68.8034	0.00034349					68.4201	0.0540429
68.9379	0.0578347					68.9379	0.0578012					68.9379	0.0599883					69.4103	0.141603					68.9034	0.000425547					68.9034	0.000419612					68.6152	0.00535254					68.9034	0.000271931					68.5196	0.0567316
69.038	0.0879808					69.038	0.0879529					69.038	0.0966485					69.5111	0.134					69.0035	0.000462611					69.0035	0.000461573					68.7147	0.00365686					69.0035	0.000288683					68.619	0.0595144
69.138	0.120513					69.138	0.12051					69.138	0.13728					69.6118	0.126057					69.1035	0.000603128					69.1035	0.000608438					68.8143	0.00458435					69.1035	0.000333445					68.7185	0.0623142
69.2381	0.145935					69.2381	0.145972					69.2381	0.169308					69.7126	0.113959					69.2035	0.000857708					69.2035	0.000860205					68.9139	0.00760877					69.2035	0.000264826					68.8179	0.0650396
69.3382	0.156411					69.3382	0.156468					69.3382	0.183653					69.8133	0.101969					69.3035	0.00124731					69.3035	0.00125884					69.0135	0.011853					69.3035	0.000258879					68.9174	0.0675924
69.4382	0.150104					69.4382	0.150148					69.4382	0.177556					69.914	0.0878749					69.4035	0.00180027					69.4035	0.00180433					69.1131	0.0163031					69.4035	0.000125551					69.0168	0.0698728
69.5383	0.132077					69.5383	0.132079					69.5383	0.156101					70.0148	0.0741127					69.5035	0.00254966					69.5035	0.00255963					69.2127	0.0200345					69.5035	0.000123745					69.1163	0.0717899
69.6383	0.110828					69.6383	0.110785					69.6383	0.129595					70.1155	0.0614162					69.6035	0.00352792					69.6035	0.00354572					69.3123	0.0222527					69.6035	0.000105265					69.2157	0.0732688
69.7384	0.0929199					69.7384	0.0928539					69.7384	0.105157					70.2163	0.0489492					69.7035	0.00476201					69.7035	0.0047626					69.4118	0.0225477					69.7035	0.000126377					69.3152	0.0742559
69.8384	0.07966					69.8384	0.0796072					69.8384	0.0867436					70.317	0.0399447					69.8035	0.00626739					69.8035	0.0062732					69.5114	0.0208694					69.8035	0.000171866					69.4146	0.0747259
69.9385	0.0681627					69.9385	0.0681463					69.9385	0.0717912					70.4177	0.0326553					69.9035	0.00804096					69.9035	0.00805655					69.611	0.017905					69.9035	0.000470782					69.5141	0.0746818
70.0385	0.0552698					70.0385	0.0552932					70.0385	0.0571902					70.5185	0.0265813					70.0035	0.010056					70.0035	0.0100707					69.7106	0.0143676					70.0035	0.00125662					69.6135	0.0741561
70.1386	0.0406065					70.1386	0.0406542					70.1386	0.0419853					70.6192	0.0218541					70.1035	0.0122584					70.1035	0.0122737					69.8102	0.0106665					70.1035	0.00239428					69.713	0.0732086
70.2386	0.0264478					70.2386	0.0264974					70.2386	0.0271257					70.72	0.0190766					70.2035	0.0145652					70.2035	0.0145815					69.9098	0.00749997					70.2035	0.00444568					69.8124	0.0719229
70.3387	0.0154179					70.3387	0.0154556					70.3387	0.0154714					70.8207	0.0181151					70.3035	0.0168691					70.3035	0.0168894					70.0094	0.00591837					70.3035	0.00674204					69.9119	0.0704004
70.4388	0.00862227					70.4388	0.00864485					70.4388	0.00817758					70.9214	0.019236					70.4035	0.0190435					70.4035	0.0190714					70.109	0.00616733					70.4035	0.00997417					70.0113	0.0687566
70.5388	0.00545816					70.5388	0.00546773					70.5388	0.00488429					71.0222	0.0211014					70.5035	0.0209547					70.5035	0.0209806					70.2085	0.00782374					70.5035	0.0140211					70.1108	0.0671126
70.6389	0.00460425					70.6389	0.0046058					70.6389	0.00419559					71.1229	0.0235945					70.6035	0.0224751					70.6035	0.0224912					70.3081	0.010126					70.6035	0.0180006					70.2102	0.0655883
70.7389	0.00507731					70.7389	0.00507317					70.7389	0.00462854					71.2237	0.0251022					70.7035	0.0234964					70.7035	0.0235193					70.4077	0.0121839					70.7035	0.0214106					70.3096	0.0642946
70.839	0.00673546					70.839	0.00672421					70.839	0.0062702					71.3244	0.0257687					70.8035	0.0239433					70.8035	0.0239599					70.5073	0.0131848					70.8035	0.0229427					70.4091	0.063323
70.939	0.0100804					70.939	0.0100597					70.939	0.00963728					71.4252	0.0252303					70.9035	0.0237821					70.9035	0.023813					70.6069	0.0126151					70.9035	0.0232808					70.5085	0.0627387
71.0391	0.0154745					71.0391	0.0154448					71.0391	0.0152526					71.5259	0.0239886					71.0036	0.0230248					71.0036	0.0230577					70.7065	0.0106732					71.0036	0.02059					70.608	0.0625718
71.1391	0.0222212					71.1391	0.0221877					71.1391	0.0224763					71.6266	0.0232253					71.1036	0.0217282					71.1036	0.0217569					70.8061	0.008144					71.1036	0.0173474					70.7074	0.0628107
71.2392	0.0282786					71.2392	0.0282537					71.2392	0.0288551					71.7274	0.022615					71.2036	0.0199866					71.2036	0.0200155					70.9056	0.00652155					71.2036	0.0134076					70.8069	0.0634002
71.3393	0.031147					71.3393	0.0311415					71.3393	0.0320926					71.8281	0.022238					71.3036	0.0179196					71.3036	0.0179384					71.0052	0.0064566					71.3036	0.00929074					70.9063	0.064243
71.4393	0.029453					71.4393	0.0294688					71.4393	0.0304279					71.9289	0.0215254					71.4036	0.0156605					71.4036	0.0156935					71.1048	0.00766385					71.4036	0.00585231					71.0058	0.0652057
71.5394	0.023969					71.5394	0.0240001					71.5394	0.0246784					72.0296	0.0209069					71.5036	0.0133402					71.5036	0.0133646					71.2044	0.00955094					71.5036	0.00376302					71.1052	0.06613
71.6394	0.0171767					71.6394	0.017212					71.6394	0.0173723					72.1303	0.0203197					71.6036	0.0110763					71.6036	0.0110987					71.304	0.0113583					71.6036	0.00251995					71.2047	0.0668477
71.7395	0.0118253					71.7395	0.0118544					71.7395	0.0113025					72.2311	0.0200113					71.7036	0.00896456					71.7036	0.0089797					71.4036	0.0123742					71.7036	0.0020351					71.3041	0.0671985
71.8395	0.00963875					71.8395	0.0096583					71.8395	0.00879112					72.3318	0.0201505					71.8036	0.00707169					71.8036	0.00709145					71.5032	0.0121148					71.8036	0.00187143					71.4036	0.0670467
71.9396	0.0108347					71.9396	0.0108459					71.9396	0.00970363					72.4326	0.0222661					71.9036	0.00543764					71.9036	0.00545496					71.6028	0.0109855					71.9036	0.00159332					71.503	0.0662977
72.0396	0.0142698					72.0396	0.0142759					72.0396	0.012952					72.5333	0.0270537					72.0036	0.00407552					72.0036	0.00409122					71.7023	0.00955187					72.0036	0.00124979					71.6025	0.0649085
72.1397	0.0179443					72.1397	0.017946					72.1397	0.0166437					72.634	0.0353558					72.1036	0.00297733					72.1036	0.00297925					71.8019	0.00815681					72.1036	0.00116707					71.7019	0.0628934
72.2397	0.0198336					72.2397	0.0198322					72.2397	0.0189758					72.7348	0.0485478					72.2036	0.00212012					72.2036	0.00211904					71.9015	0.00697955					72.2036	0.0011739					71.8014	0.0603244
72.3398	0.0188876					72.3398	0.0188856					72.3398	0.0186029					72.8355	0.0628349					72.3036	0.00147157					72.3036	0.00146864					72.0011	0.00597054					72.3036	0.00147172					71.9008	0.0573224
72.4399	0.0156341					72.4399	0.0156318					72.4399	0.0156024					72.9363	0.0765542					72.4036	0.000995605					72.4036	0.00100707					72.1007	0.00517078					72.4036	0.00171437					72.0003	0.0540479
72.5399	0.012001					72.5399	0.0119981					72.5399	0.0118446					73.037	0.0857417					72.5036	0.00065654					72.5036	0.000650399					72.2003	0.0047517					72.5036	0.00189963					72.0997	0.0506837
72.64	0.0106569					72.64	0.0106511					72.64	0.0101893					73.1377	0.0905113					72.6036	0.000421928					72.6036	0.000419612					72.2999	0.00459596					72.6036	0.00225462					72.1992	0.0474199
72.74	0.0144313					72.74	0.0144196					72.74	0.0142281					73.2385	0.0904855					72.7036	0.000264438					72.7036	0.000272748					72.3994	0.00433919					72.7036	0.00247204					72.2986	0.0444391
72.8401	0.025725					72.8401	0.0257033					72.8401	0.027023					73.3392	0.0890318					72.8036	0.000161483					72.8036	0.000167845					72.499	0.00381427					72.8036	0.00277548					72.3981	0.0419007
72.9401	0.0452325					72.9401	0.045199					72.9401	0.0503873					73.44	0.0858016					72.9036	9.60912e-05					72.9036	0.000104903					72.5986	0.00301825					72.9036	0.00310591					72.4975	0.0399347
73.0402	0.0700979					73.0402	0.0700581					73.0402	0.0795076					73.5407	0.0837999					73.0037	5.57828e-05					73.0037	6.29418e-05					72.6982	0.00219961					73.0037	0.00301801					72.597	0.0386342
73.1402	0.0932931					73.1402	0.0932563					73.1402	0.106347					73.6414	0.0823286					73.1037	3.15728e-05					73.1037	4.19612e-05					72.7978	0.00167911					73.1037	0.00262811					72.6964	0.0380547
73.2403	0.10624					73.2403	0.106222					73.2403	0.121537					73.7422	0.0809989					73.2037	1.73463e-05					73.2037	2.09806e-05					72.8974	0.00157869					73.2037	0.00319898					72.7958	0.0382161
73.3404	0.103977					73.3404	0.103983					73.3404	0.118391					73.8429	0.0788288					73.3037	9.35953e-06					73.3037	0					72.997	0.00188064					73.3037	0.00346057					72.8953	0.0391064
73.4404	0.0888456					73.4404	0.088868					73.4404	0.101323					73.9437	0.0752088					73.4037	4.86696e-06					73.4037	0					73.0965	0.00229323					73.4037	0.00427914					72.9947	0.0406878
73.5405	0.0692059					73.5405	0.0692296					73.5405	0.0781378					74.0444	0.0715362					73.5037	2.49588e-06					73.5037	0					73.1961	0.00254463					73.5037	0.00516932					73.0942	0.0429031
73.6405	0.0540522					73.6405	0.0540643					73.6405	0.058947					74.1451	0.0662052					73.6037	1.24794e-06					73.6037	0					73.2957	0.00257368					73.6037	0.00558125					73.1936	0.0456803
73.7406	0.0479703					73.7406	0.0479639					73.7406	0.0502137					74.2459	0.0608871					73.7037	6.23969e-07					73.7037	0					73.3953	0.00245246					73.7037	0.00566419					73.2931	0.0489367
73.8406	0.0499471					73.8406	0.0499298					73.8406	0.0506542					74.3466	0.05426					73.8037	2.49588e-07					73.8037	0					73.4949	0.00244145					73.8037	0.00512383					73.3925	0.0525835
73.9407	0.0558189					73.9407	0.0557999					73.9407	0.0568681					74.4474	0.0484146					73.9037	2.49588e-07					73.9037	0					73.5945	0.00265967					73.9037	0.00481697					73.492	0.0565229
74.0407	0.0614727					74.0407	0.0614605					74.0407	0.0636971					74.5481	0.0432509					74.0037	2.49588e-07					74.0037	0					73.6941	0.00299048					74.0037	0.00460197					73.5914	0.0606514
74.1408	0.064369					74.1408	0.064368					74.1408	0.0675175					74.6489	0.0389275					74.1037	3.74381e-07					74.1037	0					73.7937	0.00337747					74.1037	0.00459085					73.6909	0.0648564
74.2408	0.0632717					74.2408	0.0632847					74.2408	0.0666663					74.7496	0.036314					74.2037	6.23969e-07					74.2037	0					73.8932	0.00384449					74.2037	0.00444634					73.7903	0.0690137
74.3409	0.0577253					74.3409	0.0577501					74.3409	0.0606801					74.8503	0.037842					74.3037	1.24794e-06					74.3037	0					73.9928	0.00424216					74.3037	0.00471233					73.8898	0.0729906
74.441	0.0482396					74.441	0.0482728					74.441	0.0501717					74.9511	0.0433449					74.4037	2.62067e-06					74.4037	0					74.0924	0.0042732					74.4037	0.00369979					73.9892	0.0766418
74.541	0.0365498					74.541	0.0365837					74.541	0.0370807					75.0518	0.0538281					74.5037	5.11654e-06					74.5037	0					74.192	0.00378297					74.5037	0.00275764					74.0887	0.0798168
74.6411	0.0250589					74.6411	0.0250864					74.6411	0.0242203					75.1526	0.069126					74.6037	9.60912e-06					74.6037	0					74.2916	0.00275953					74.6037	0.00208819					74.1881	0.0823642
74.7411	0.0157608					74.7411	0.0157784					74.7411	0.0139661					75.2533	0.0872203					74.7037	1.79703e-05					74.7037	2.09806e-05					74.3912	0.00156255					74.7037	0.00153428					74.2876	0.0841393
74.8412	0.00969301					74.8412	0.00970652					74.8412	0.00815123					75.354	0.103871					74.8037	3.25712e-05					74.8037	4.19612e-05					74.4908	0.000703987					74.8037	0.00120529					74.387	0.0850164
74.9412	0.00744648					74.9412	0.00746511					74.9412	0.00644888					75.4548	0.116763					74.9037	5.76547e-05					74.9037	6.29418e-05					74.5903	0.000245591					74.9037	0.00107496					74.4865	0.0848973
75.0413	0.0102161					75.0413	0.0102546					75.0413	0.00846786					75.5555	0.120428					75.0038	9.94606e-05					75.0038	0.000104903					74.6899	0.000102966					75.0038	0.000818105					74.5859	0.0837229
75.1413	0.0204422					75.1413	0.020517					75.1413	0.0195359					75.6563	0.11738					75.1038	0.000167224					75.1038	0.000167845					74.7895	0.000580063					75.1038	0.000682641					74.6854	0.0814799
75.2414	0.0409931					75.2414	0.0411176					75.2414	0.0456367					75.757	0.109758					75.2038	0.000273798					75.2038	0.000272748					74.8891	0.00209494					75.2038	0.000585903					74.7848	0.0782073
75.3415	0.0724725					75.3415	0.072635					75.3415	0.0852252					75.8577	0.0972698					75.3038	0.000437153					75.3038	0.000440593					74.9887	0.00490017					75.3038	0.000842314					74.8843	0.0739926
75.4415	0.109918					75.4415	0.11008					75.4415	0.13217					75.9585	0.0843497					75.4038	0.000680376					75.4038	0.00069236					75.0883	0.00893773					75.4038	0.000985907					74.9837	0.0689728
75.5416	0.142262					75.5416	0.142365					75.5416	0.171051					76.0592	0.0709835					75.5038	0.00103204					75.5038	0.00102805					75.1879	0.0130761					75.5038	0.000786527					75.0831	0.0633208
75.6416	0.156948					75.6416	0.156946					75.6416	0.18697					76.16	0.0596642					75.6038	0.00152598					75.6038	0.00153158					75.2875	0.0160651					75.6038	0.00060303					75.1826	0.0572368
75.7417	0.147562					75.7417	0.147457					75.7417	0.175263					76.2607	0.0482251					75.7038	0.00219912					75.7038	0.00220296					75.387	0.0172119					75.7038	0.000518936					75.282	0.0509359
75.8417	0.118234					75.8417	0.118072					75.8417	0.138002					76.3614	0.0378641					75.8038	0.00308927					75.8038	0.00310513					75.4866	0.0162142					75.8038	0.000566639					75.3815	0.0446288
75.9418	0.0807632					75.9418	0.080601					75.9418	0.0907483					76.4622	0.0296395					75.9038	0.00423001					75.9038	0.00423808					75.5862	0.0135763					75.9038	0.000598999					75.4809	0.0385174
76.0418	0.047098					76.0418	0.046975					76.0418	0.0487632					76.5629	0.024001					76.0038	0.00564555					76.0038	0.00566476					75.6858	0.0100644					76.0038	0.000826795					75.5804	0.0327787
76.1419	0.023602					76.1419	0.0235288					76.1419	0.0198884					76.6637	0.0215287					76.1038	0.00734449					76.1038	0.00736419					75.7854	0.00673415					76.1038	0.00154365					75.6798	0.0275608
76.2419	0.0104818					76.2419	0.0104445					76.2419	0.0067731					76.7644	0.0210341					76.2038	0.00931274					76.2038	0.00933637					75.885	0.00430733					76.2038	0.0025162					75.7793	0.0229809
76.342	0.00470392					76.342	0.00468845					76.342	0.00277552					76.8652	0.0214125					76.3038	0.0115106					76.3038	0.0115184					75.9846	0.00262003					76.3038	0.00398363					75.8787	0.0191221
76.4421	0.00303697					76.4421	0.0030315					76.4421	0.00191405					76.9659	0.0230437					76.4038	0.0138672					76.4038	0.0138892					76.0841	0.00156254					76.4038	0.00554743					75.9782	0.0160406
76.5421	0.00344054					76.5421	0.00343885					76.5421	0.00237781					77.0666	0.0248256					76.5038	0.0162841					76.5038	0.0163019					76.1837	0.00140359					76.5038	0.00795328					76.0776	0.0137667
76.6422	0.00509153					76.6422	0.00508989					76.6422	0.00346326					77.1674	0.0279281					76.6038	0.0186392					76.6038	0.0186518					76.2833	0.00240785					76.6038	0.0113733					76.1771	0.0123118
76.7422	0.00785626					76.7422	0.00785278					76.7422	0.00558319					77.2681	0.0301515					76.7038	0.0207951					76.7038	0.0208128					76.3829	0.00473516					76.7038	0.0158836					76.2765	0.011673
76.8423	0.0117067					76.8423	0.0117					76.8423	0.00892309					77.3689	0.0350253					76.8038	0.0226145					76.8038	0.0226381					76.4825	0.00810357					76.8038	0.021002					76.376	0.0118357
76.9423	0.016249					76.9423	0.0162389					76.9423	0.013029					77.4696	0.0404139					76.9038	0.0239711					76.9038	0.0240018					76.5821	0.0114614					76.9038	0.0244065					76.4754	0.0127763
77.0424	0.0205385					77.0424	0.0205278					77.0424	0.0171383					77.5703	0.0452365					77.0039	0.0247671					77.0039	0.0247991					76.6817	0.0138449					77.0039	0.0270058					76.5749	0.0144616
77.1424	0.0233961					77.1424	0.0233871					77.1424	0.0200906					77.6711	0.0488598					77.1039	0.0249428					77.1039	0.0249669					76.7813	0.0145813					77.1039	0.0274222					76.6743	0.0168483
77.2425	0.0242492					77.2425	0.0242432					77.2425	0.0215011					77.7718	0.0512755					77.2039	0.0244847					77.2039	0.0245054					76.8808	0.0134696					77.2039	0.0248338					76.7738	0.0198786
77.3426	0.0240055					77.3426	0.0240001					77.3426	0.0223192					77.8726	0.0510768					77.3039	0.0234275					77.3039	0.0234563					76.9804	0.0110325					77.3039	0.0201098					76.8732	0.0234809
77.4426	0.025098					77.4426	0.0250854					77.4426	0.0244383					77.9733	0.0503338					77.4039	0.0218495					77.4039	0.0218828					77.08	0.00811551					77.4039	0.0148835					76.9727	0.0275636
77.5427	0.0301805					77.5427	0.0301546					77.5427	0.0310018					78.074	0.0492567					77.5039	0.0198627					77.5039	0.0198896					77.1796	0.00595993					77.5039	0.0107259					77.0721	0.032017
77.6427	0.0399962					77.6427	0.0399576					77.6427	0.0426357					78.1748	0.0493406					77.6039	0.0176					77.6039	0.0176237					77.2792	0.00535801					77.6039	0.0067503					77.1716	0.0367138
77.7428	0.0519539					77.7428	0.0519153					77.7428	0.055883					78.2755	0.0494277					77.7039	0.0152013					77.7039	0.0152319					77.3788	0.00634551					77.7039	0.00503065					77.271	0.0415096
77.8428	0.0609723					77.8428	0.0609498					77.8428	0.0664313					78.3763	0.0492889					77.8039	0.0127972					77.8039	0.0128192					77.4784	0.00853671					77.8039	0.00376401					77.3705	0.0462511
77.9429	0.0625531					77.9429	0.0625586					77.9429	0.069248					78.477	0.0479315					77.9039	0.0105013					77.9039	0.0105323					77.5779	0.010996					77.9039	0.00335615					77.4699	0.0507783
78.0429	0.0559988					78.0429	0.0560302					78.0429	0.0629897					78.5777	0.0441031					78.0039	0.00839949					78.0039	0.00841322					77.6775	0.0128476					78.0039	0.00345197					77.5693	0.0549342
78.143	0.0451075					78.143	0.0451508					78.143	0.0521851					78.6785	0.040437					78.1039	0.00654843					78.1039	0.00656693					77.7771	0.0133895					78.1039	0.00306857					77.6688	0.058571
78.243	0.0357522					78.243	0.0357887					78.243	0.0419996					78.7792	0.0364855					78.2039	0.0049764					78.2039	0.00499338					77.8767	0.0123661					78.2039	0.0031395					77.7682	0.0615558
78.3431	0.0322499					78.3431	0.0322701					78.3431	0.0377486					78.88	0.0306738					78.3039	0.00368603					78.3039	0.00369259					77.9763	0.0102161					78.3039	0.00273968					77.8677	0.0637802
78.4432	0.0350442					78.4432	0.0350468					78.4432	0.0410321					78.9807	0.0262167					78.4039	0.00266135					78.4039	0.00266454					78.0759	0.00758331					78.4039	0.0027605					77.9671	0.0651609
78.5432	0.0408278					78.5432	0.0408215					78.5432	0.0472265					79.0814	0.0218766					78.5039	0.0018729					78.5039	0.00188825					78.1755	0.00534556					78.5039	0.00206341					78.0666	0.0656467
78.6433	0.044738					78.6433	0.0447326					78.6433	0.0515453					79.1822	0.0176081					78.6039	0.00128475					78.6039	0.0013008					78.275	0.00404696					78.6039	0.00155774					78.166	0.0652193
78.7433	0.0432607					78.7433	0.0432626					78.7433	0.0499786					79.2829	0.0142613					78.7039	0.00085908					78.7039	0.000860205					78.3746	0.00360407					78.7039	0.00134748					78.2655	0.0638942
78.8434	0.0360865					78.8434	0.0360976					78.8434	0.0411704					79.3837	0.0109418					78.8039	0.000559825					78.8039	0.000566476					78.4742	0.00379621					78.8039	0.00100324					78.3649	0.0617196
78.9434	0.0257758					78.9434	0.0257909					78.9434	0.0286216					79.4844	0.00773332					78.9039	0.000355662					78.9039	0.00035667					78.5738	0.00426434					78.9039	0.00079991					78.4644	0.0587753
79.0435	0.0157251					79.0435	0.01574					79.0435	0.0161037					79.5851	0.005101					79.004	0.000220261					79.004	0.000230787					78.6734	0.00466939					79.004	0.000668708					78.5638	0.0551671
79.1435	0.00818582					79.1435	0.00819618					79.1435	0.00683342					79.6859	0.00324769					79.104	0.000132905					79.104	0.000125884					78.773	0.00474517					79.104	0.000508847					78.6633	0.0510233
79.2436	0.00363406					79.2436	0.00364056					79.2436	0.0023936					79.7866	0.00195269					79.204	7.82457e-05					79.204	8.39224e-05					78.8726	0.004351					79.204	0.000356355					78.7627	0.0464863
79.3437	0.00137569					79.3437	0.00137849					79.3437	0.000823636					79.8874	0.00145457					79.304	4.4801e-05					79.304	4.19612e-05					78.9722	0.00361023					79.304	0.00023033					78.8622	0.0417077
79.4437	0.000443966					79.4437	0.000444738					79.4437	0.000214502					79.9881	0.00100725					79.404	2.50835e-05					79.404	2.09806e-05					79.0717	0.00269868					79.404	0.000209381					78.9616	0.0368379
79.5438	0.000122131					79.5438	0.000122008					79.5438	2.63274e-05					80.0888	0.000975122					79.504	1.36025e-05					79.504	2.09806e-05					79.1713	0.00183312					79.504	0.000223765					79.0611	0.0320191
79.6438	2.86357e-05					79.6438	2.85341e-05					79.6438	0					80.1896	0.00110718					79.604	7.23804e-06					79.604	0					79.2709	0.00117859					79.604	0.000158583					79.1605	0.0273788
79.7439	5.72319e-06					79.7439	5.90361e-06					79.7439	2.81785e-06					80.2903	0.00085072					79.704	3.74381e-06					79.704	0					79.3705	0.000731321					79.704	0.000206991					79.26	0.0230228
79.8439	9.73668e-07					79.8439	9.83935e-07					79.8439	6.54594e-06					80.3911	0.000882431					79.804	1.87191e-06					79.804	0					79.4701	0.000447086					79.804	0.00035174					79.3594	0.0190334
79.944	1.41925e-07					79.944	0					79.944	2.13313e-11					80.4918	0.000627404					79.904	8.73556e-07					79.904	0					79.5697	0.000247927					79.904	0.000324942					79.4589	0.0154651
